# Supplementary material
Source: publisher figshare collection journal article supplement (https://gsapubs.figshare.com/ndownloader/files/22411443)
Supplement: Supplementary file 1 [file 22411443]

## London Situations – all at 5x vertical exaggeration

### Situation 1:

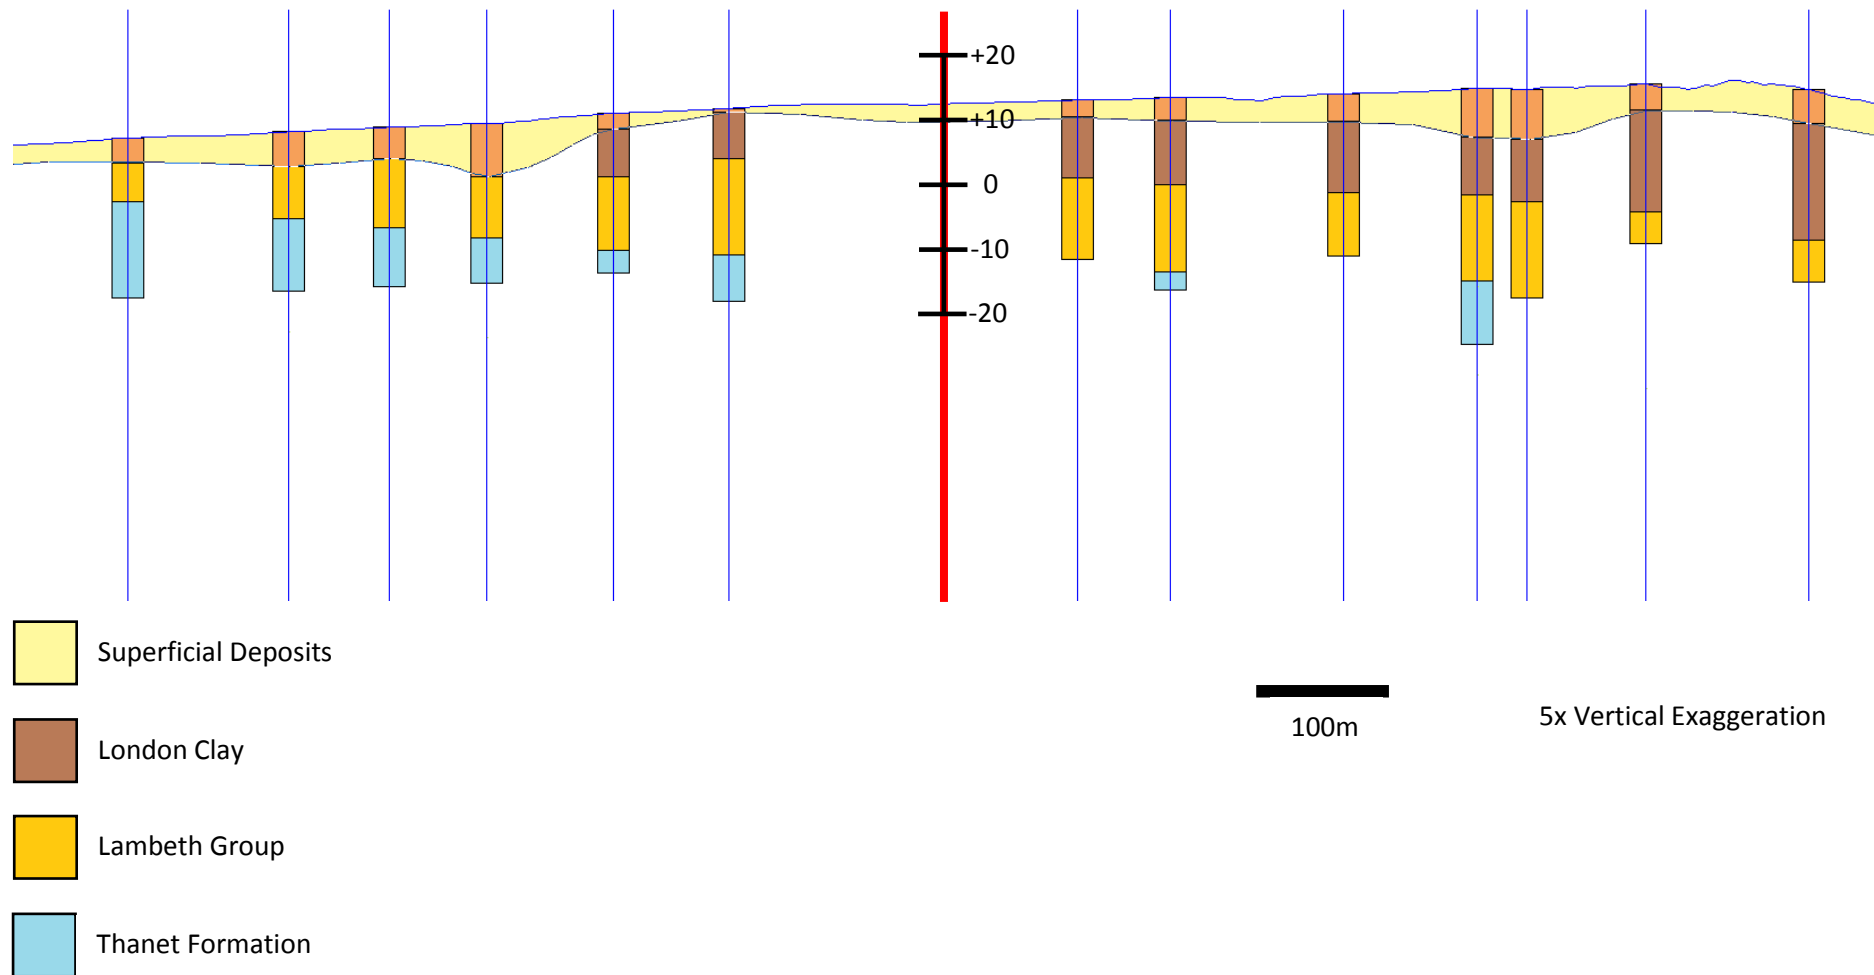

Situation 2:

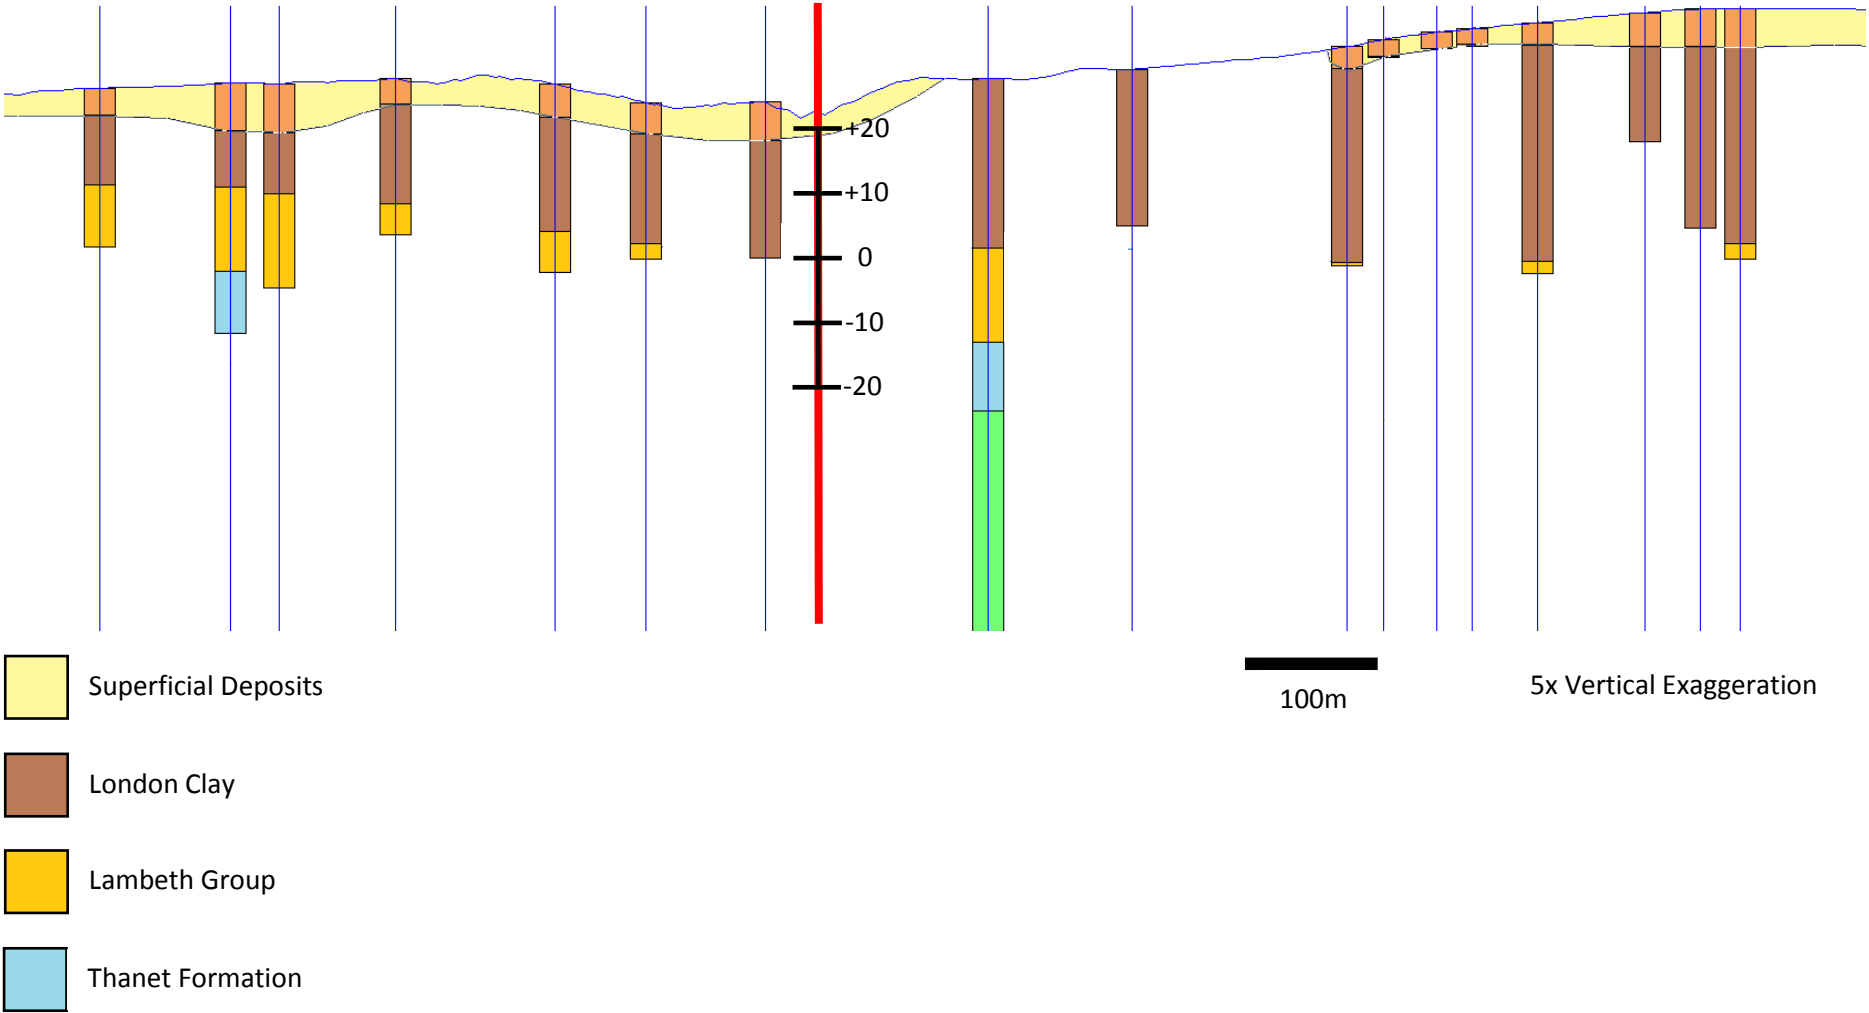

Situation 3:

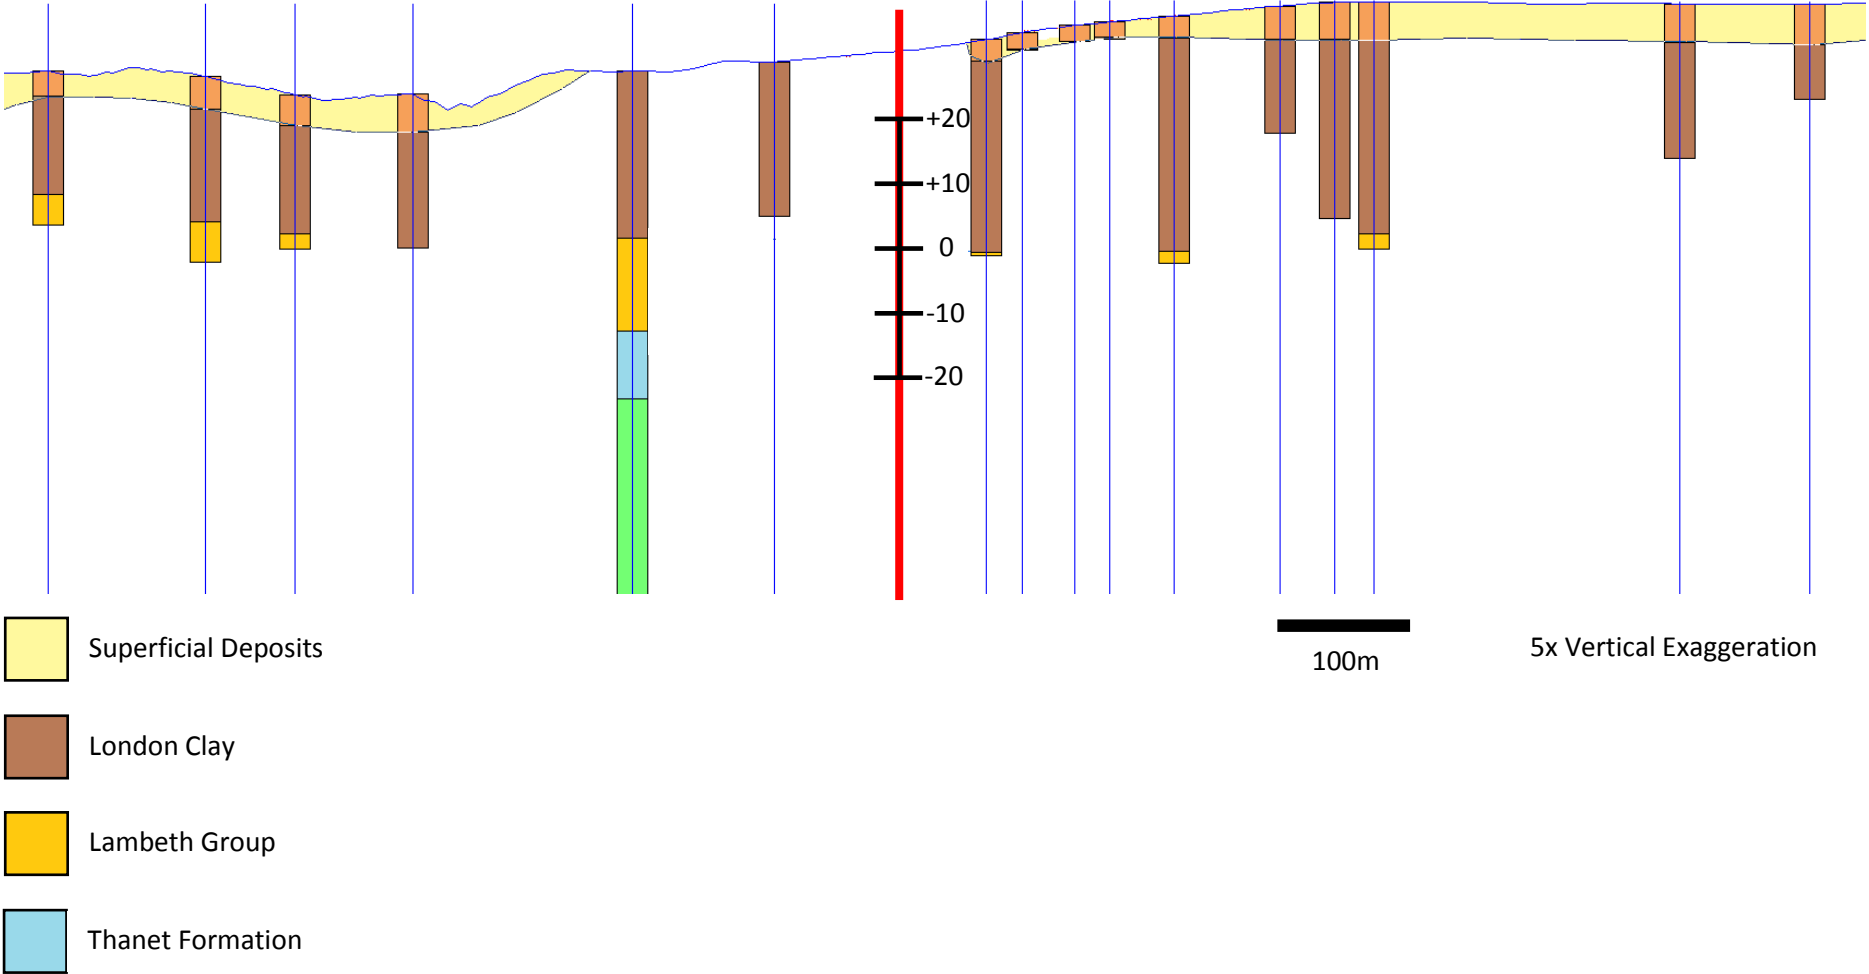

Situation 4:

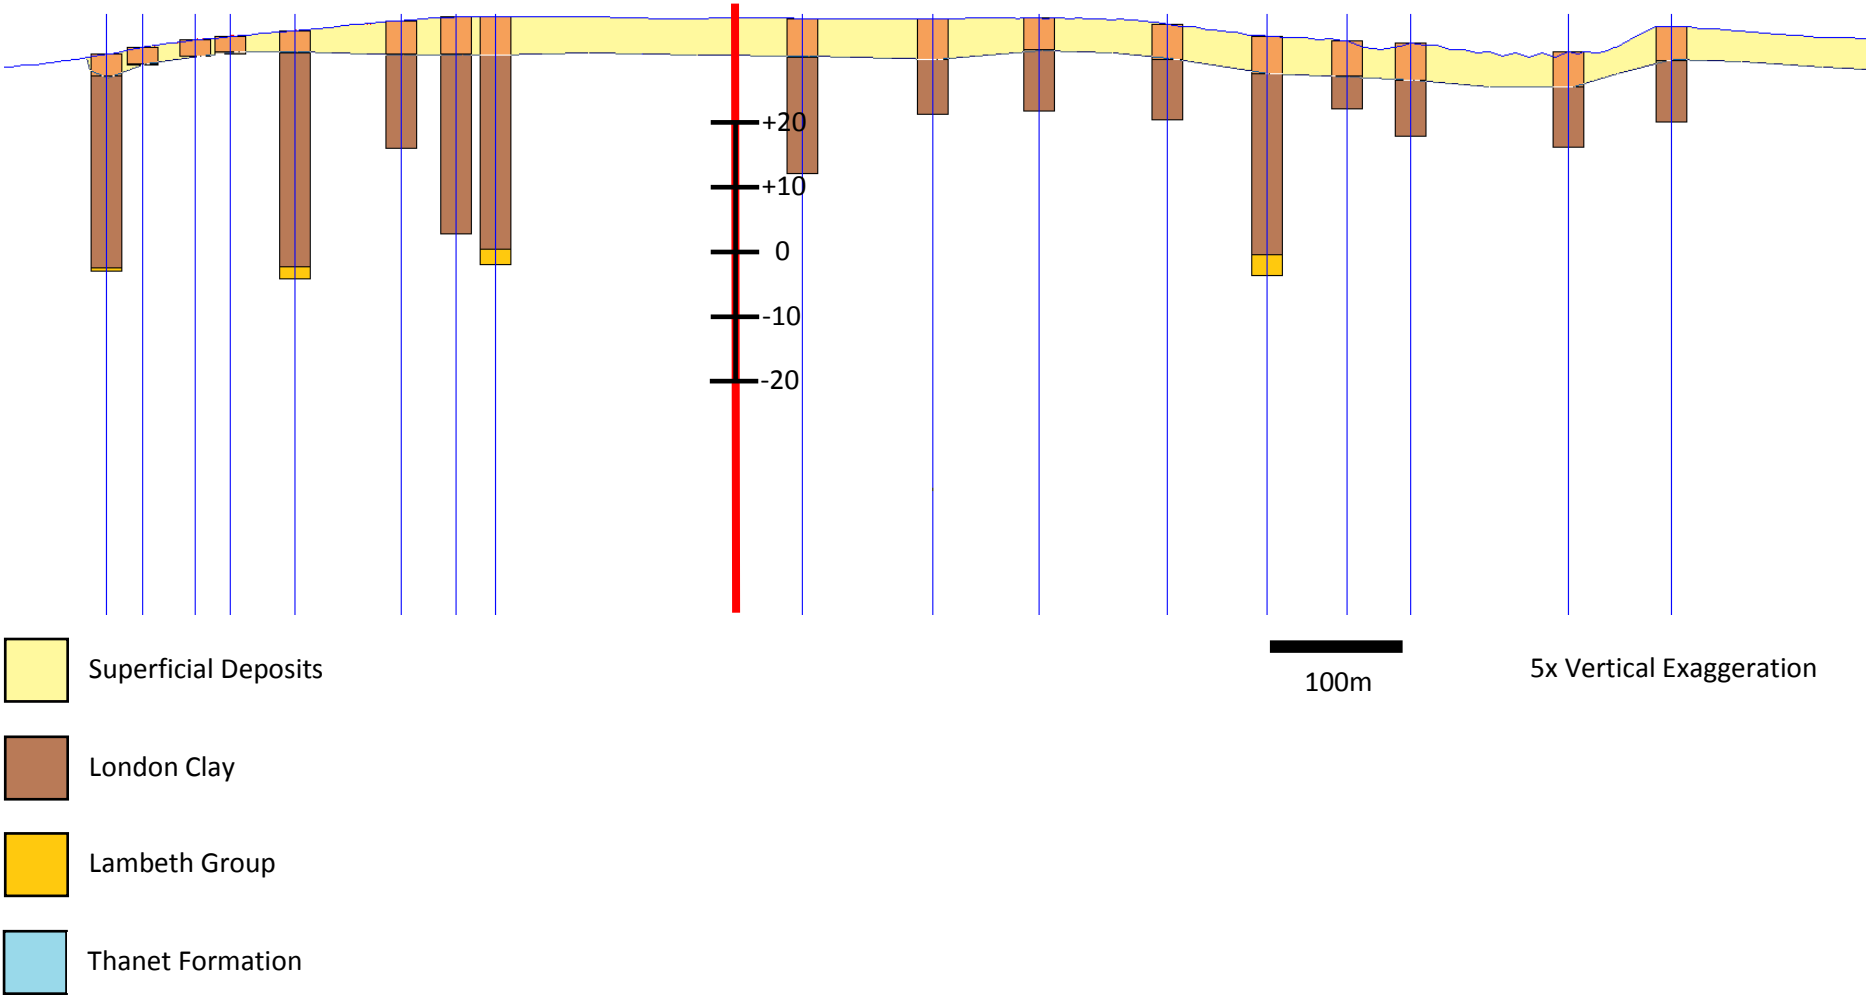

Situation 5:

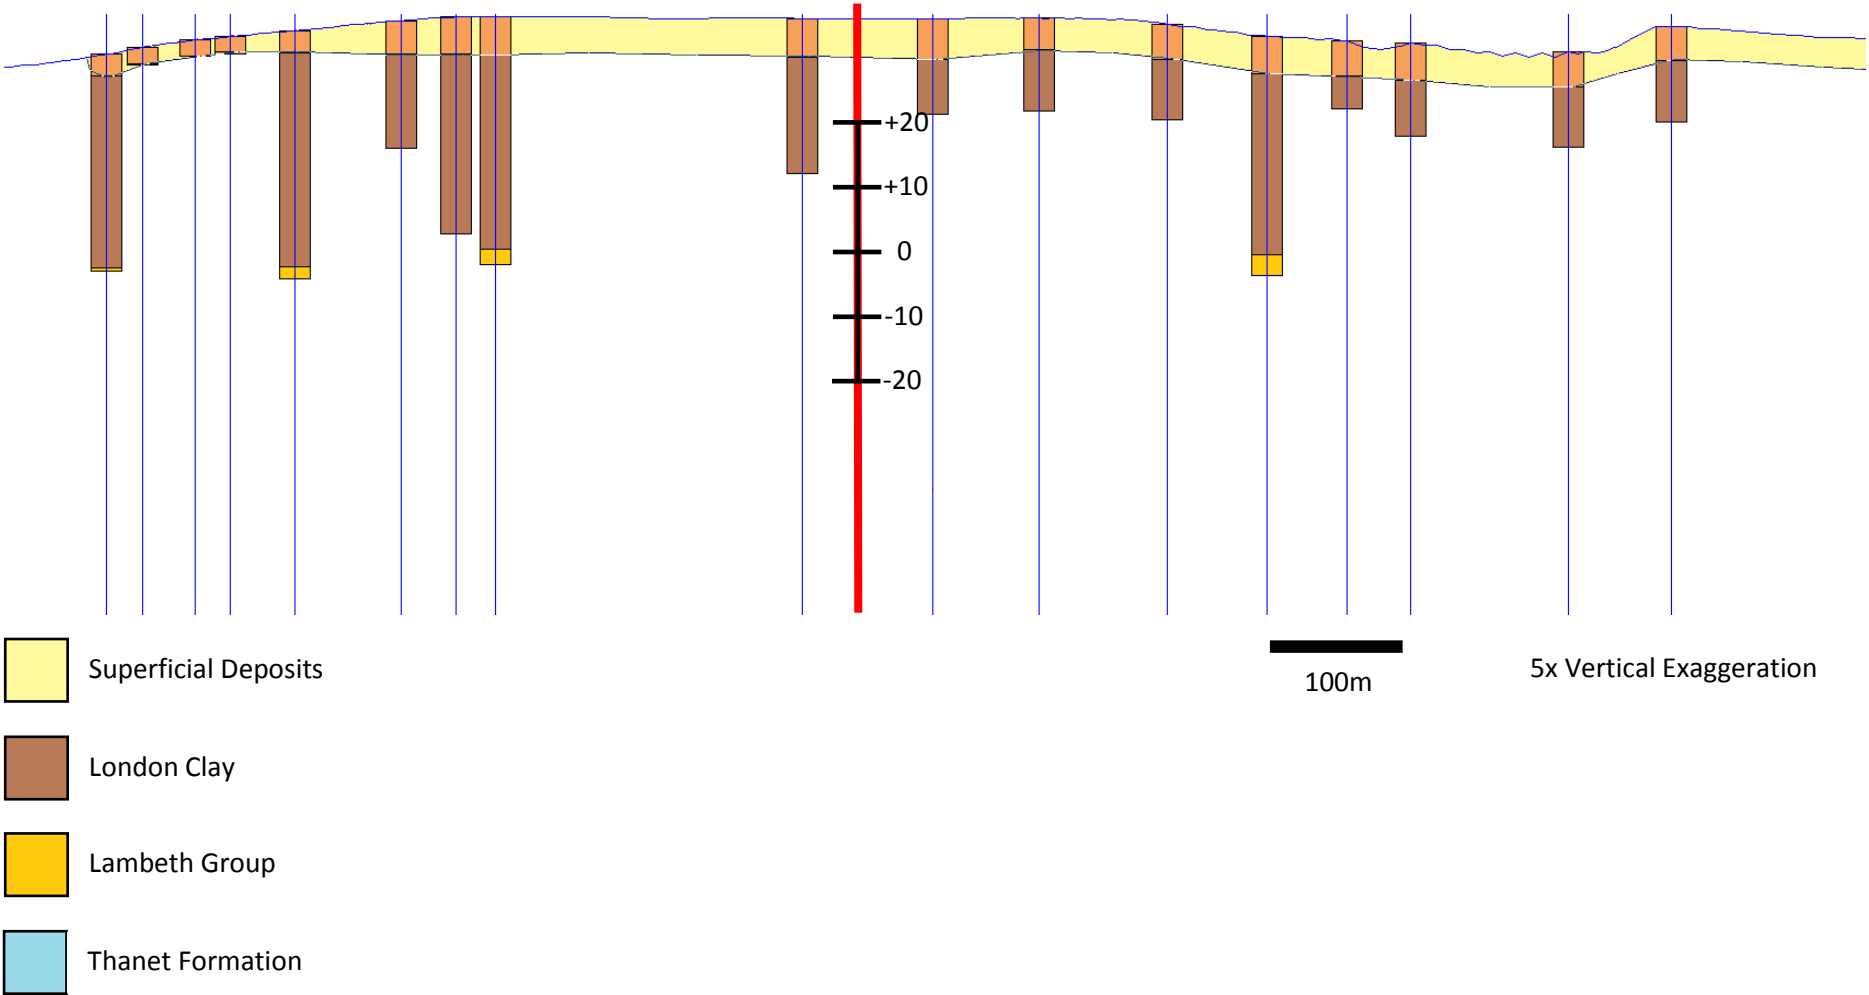

Situation 6:

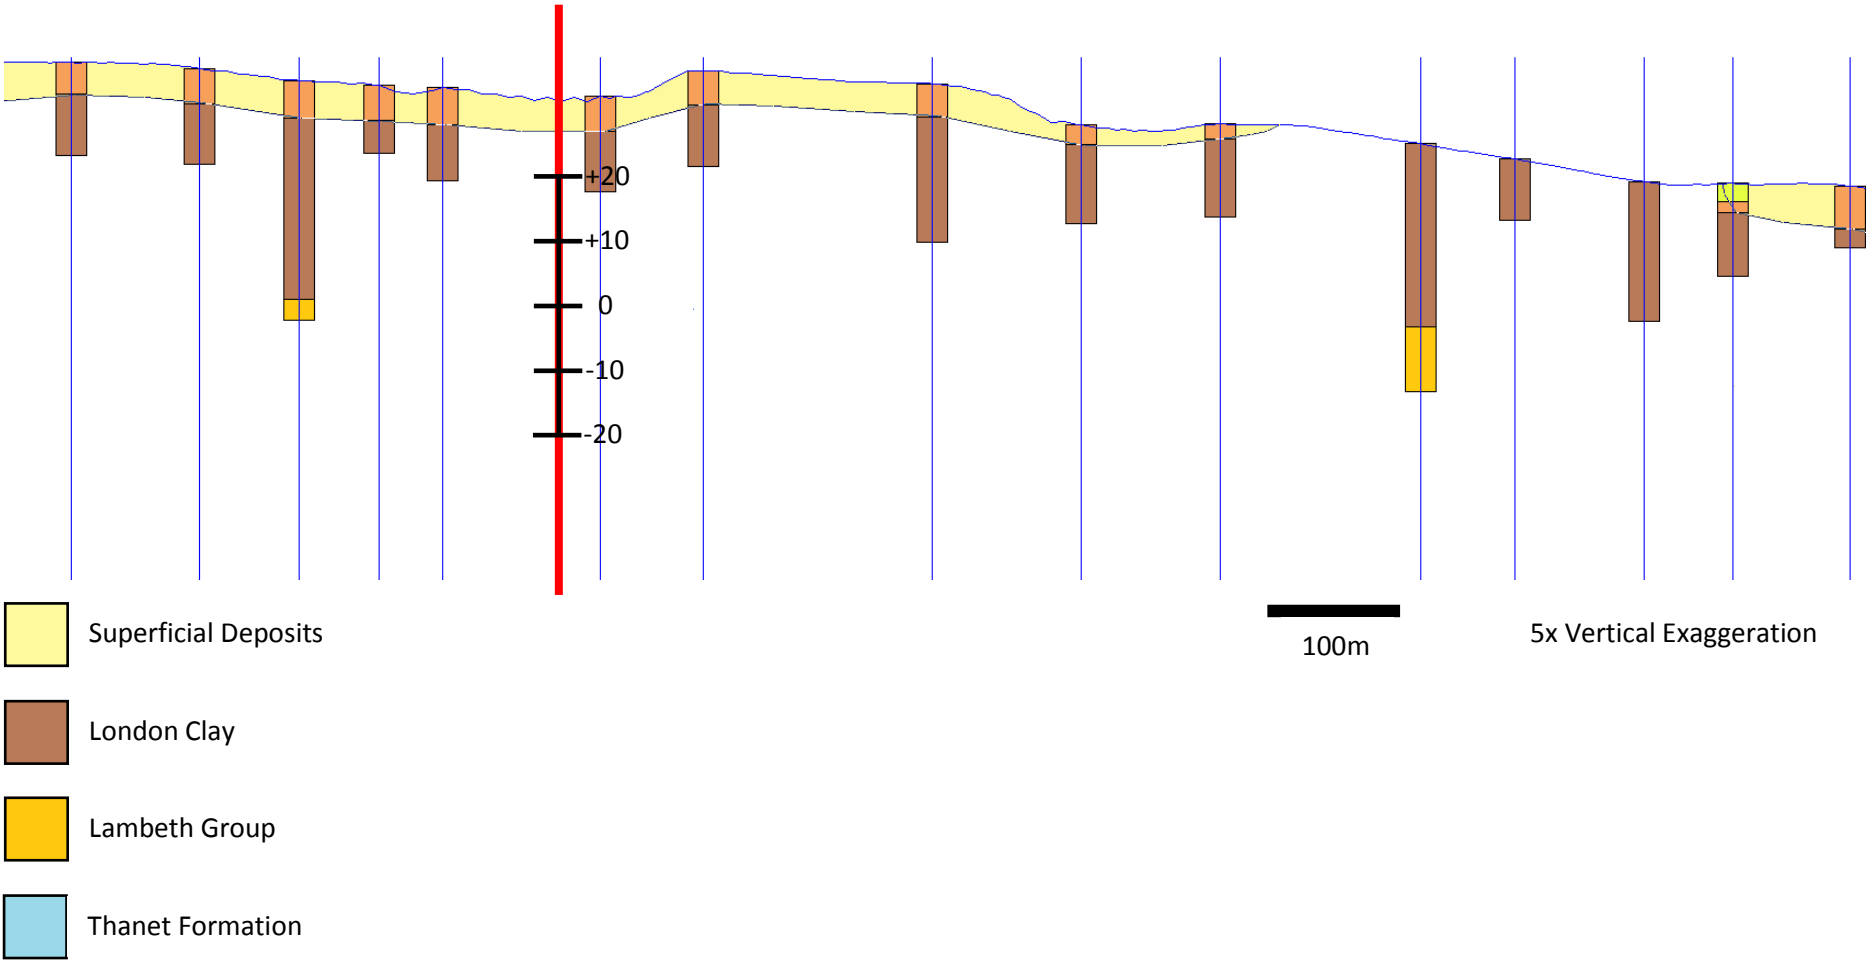

Situation 7:

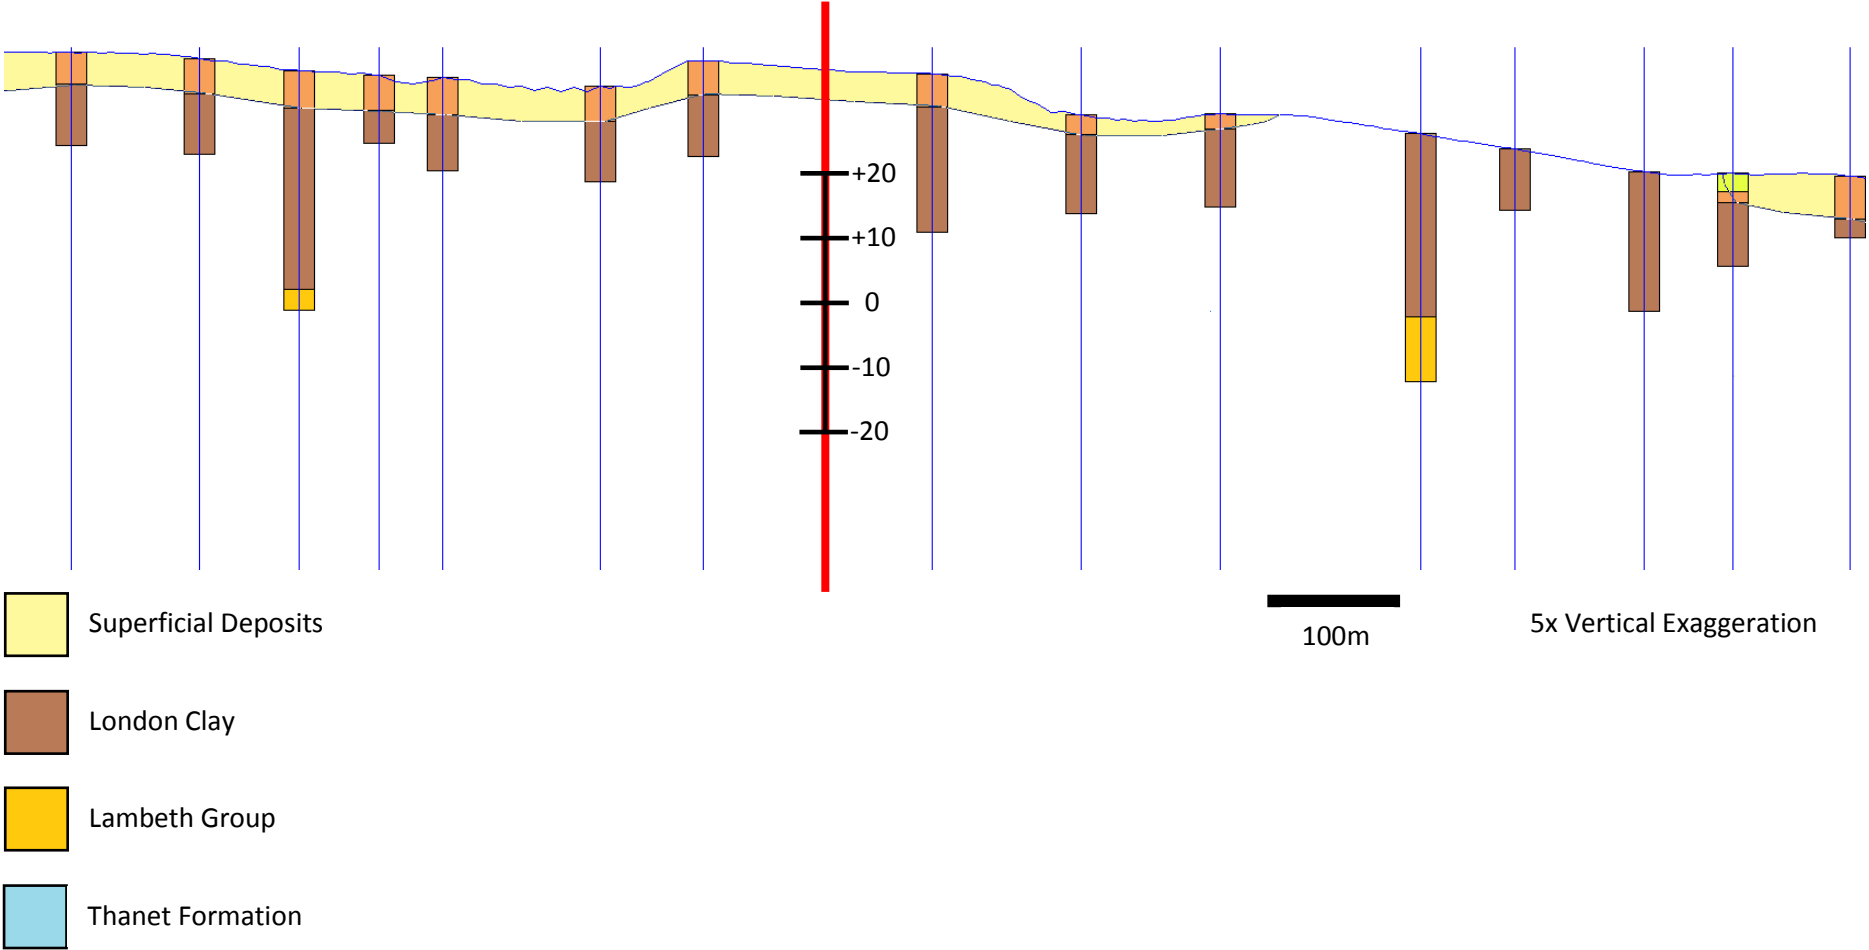

Situation 8:

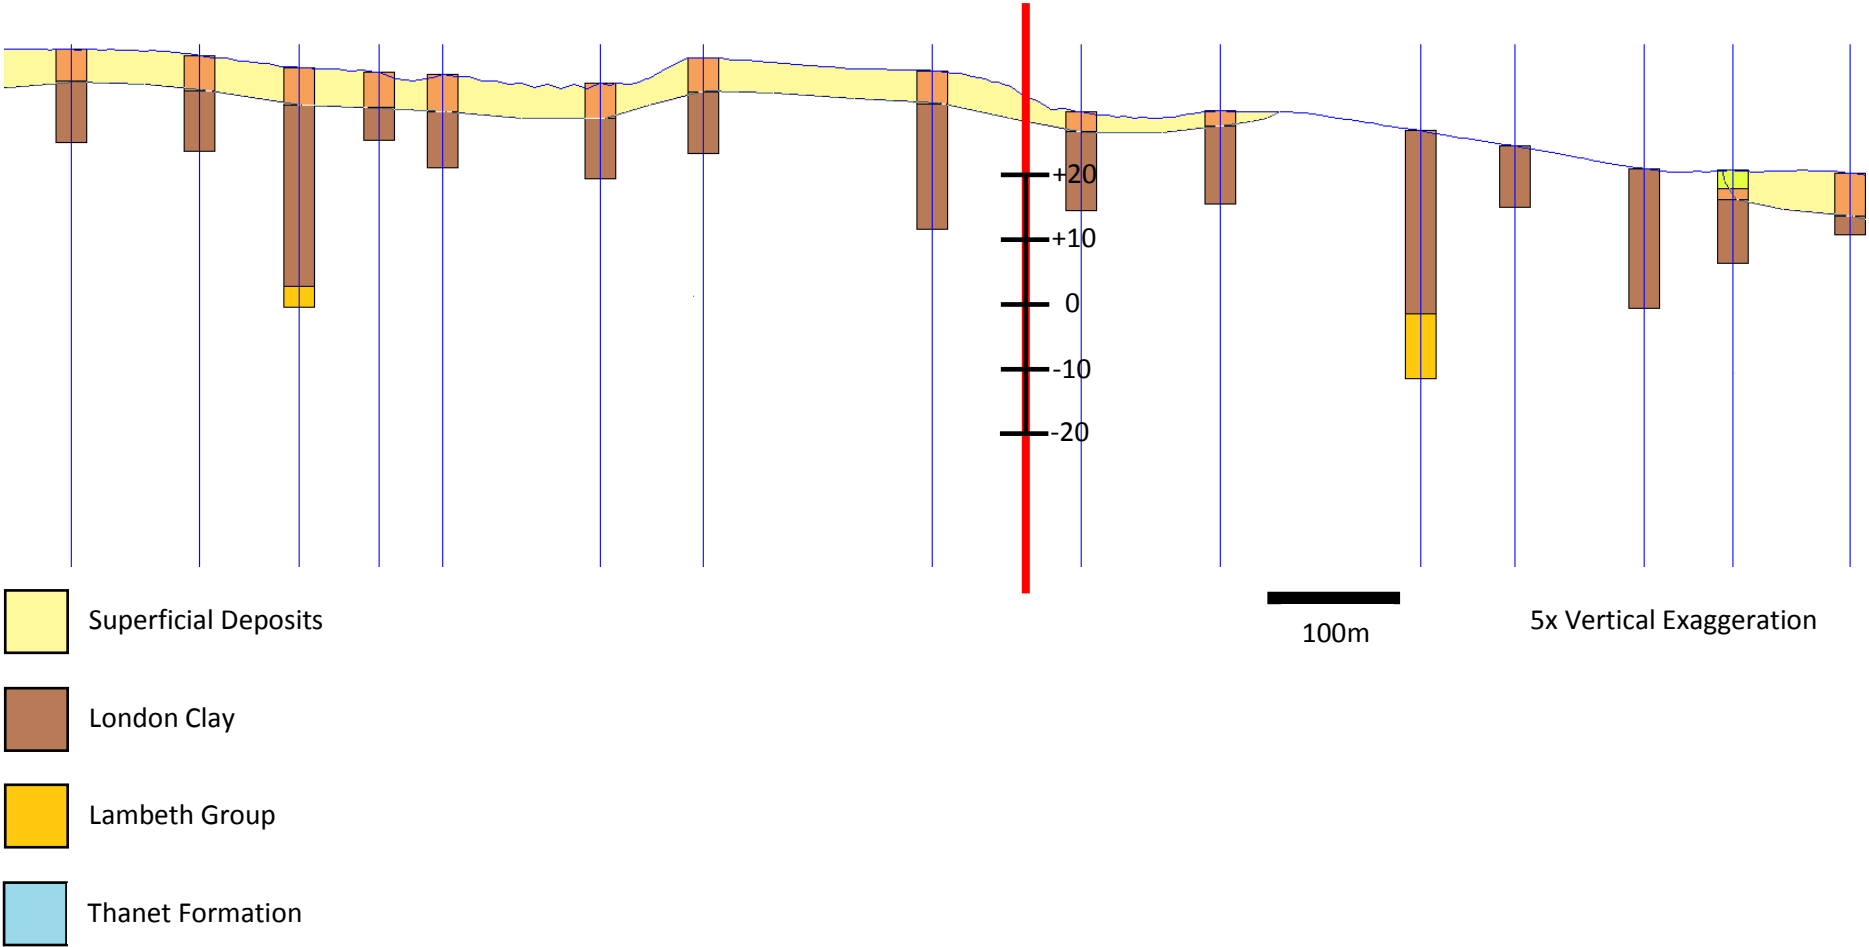



## Glasgow Map and associated Lithological Descriptions

The experts were asked to interpret the top of the rockhead/base of the superficial deposits.

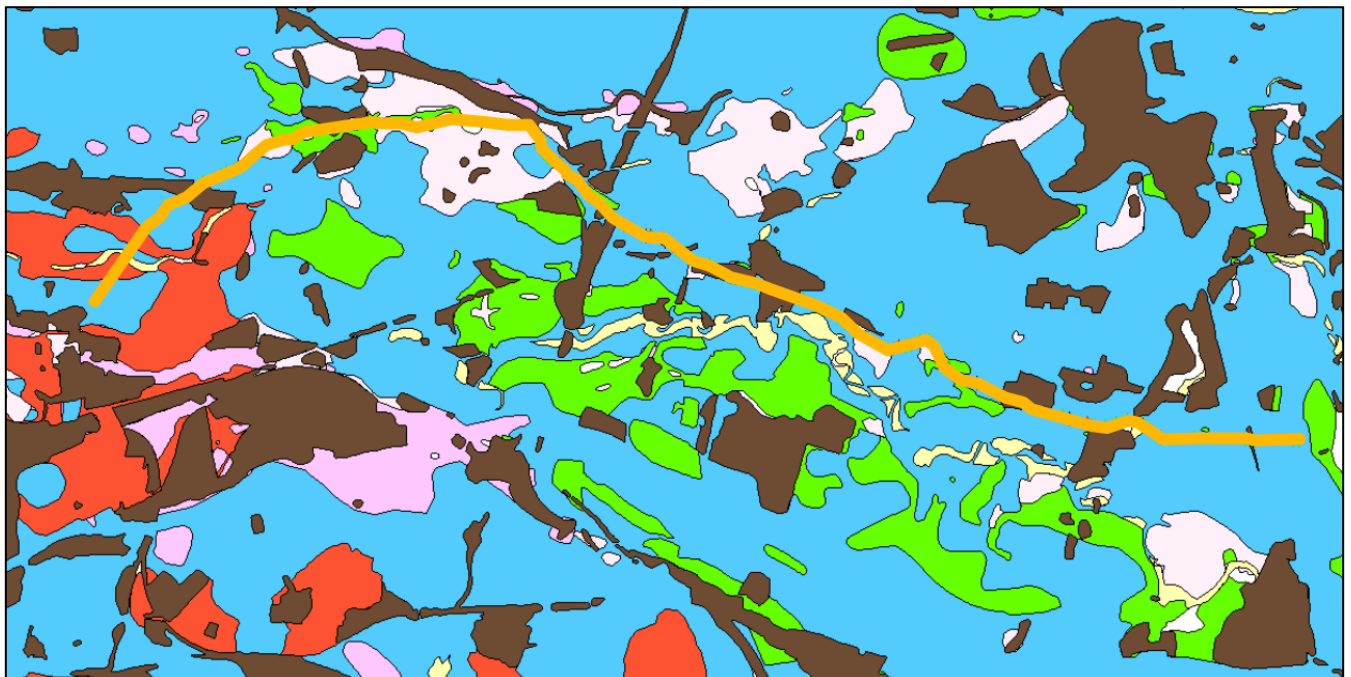

0 2 4 km

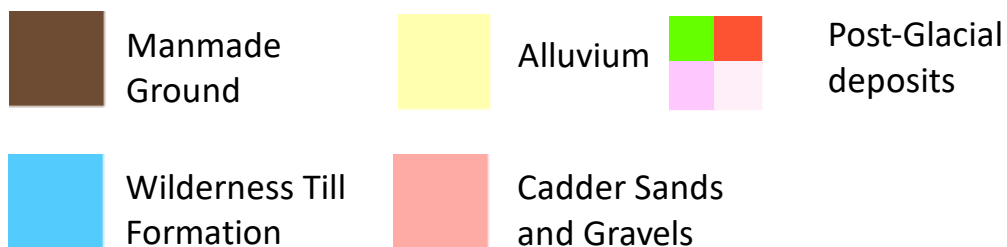

### Lithological descriptions (in reverse stratigraphic order)

#### *Wilderness Till (WITI-DMTN)*

The Wilderness Till Formation is present along most of the section. It is a glacial till dating from between 27500 BP and 13500 BP. The typical lithology is a glacially organised diamicton composed of isolated boulders, gravel and pebbles in matrix of sandy silty clay.

| CODE     | DESCRIPTION      | COLOUR                                                                               |
|----------|------------------|--------------------------------------------------------------------------------------|
| B / TILL | Boulders         |  |
| C        | Clay             |  |
| CS       | Sandy clay       |  |
| CZ       | Clay silty       |  |
| CZS      | Clay silty sandy |  |

|               |                                           |  |
|---------------|-------------------------------------------|--|
| CZSV / TILL   | Clay silty sandy bouldery                 |  |
| CZSVL / TILL  | Clay silty sandy gravelly cobbly          |  |
| CZSVLB / TILL | Clay silty sandy gravelly cobbly bouldery |  |
| CZV / TILL    | Clay silty gravelly                       |  |
| S             | Sand                                      |  |
| SAGR          | Sand and gravel                           |  |
| SCV           | Sand clayey gravelly                      |  |
| SCVL / TILL   | Sand clayey gravelly cobbly               |  |
| Z             | Silt                                      |  |
| ZC            | Clayey silt                               |  |
| ZSC           | Silt sandy gravelly                       |  |

Table 1: Explanation of lithological codes used in boreholes to describe the Wilderness Till Formation

### *Cadder Sand and Gravel (CADR-XSV)*

The Cadder Sand and Gravel Formation underlies the Wilderness Till and is present along approximately 15% of the section. It is a fluvial or deltaic deposit formed from a major outwash system resulting from the main late-Devensian ice sheet. The formation consists of bedded and trough cross-bedded dense sand or silty sand, with gravel and some cobbles and occasional clay lenses.

|      |                      |  |
|------|----------------------|--|
| C    | Clay                 |  |
| CS   | Sandy clay           |  |
| CZ   | Silty clay           |  |
| S    | Sand                 |  |
| SAGR | Sand and gravel      |  |
| SV   | Gravelly sand        |  |
| SVL  | Sand gravelly cobbly |  |
| V    | Gravel               |  |
| Z    | Silt                 |  |

Table 2 - Explanation of lithological codes used in boreholes to describe the Cadder Sand and Gravel

### *Broomhill Clay (BRLL-XCZ)*

The Broomhill Clay Formation is present along a small portion of the section and may not make an appearance in your borehole set. The typical lithology is a thinly bedded silty clay with bands of silt or sand.

|     |                     |  |
|-----|---------------------|--|
| CZ  | Clay silty          |  |
| CZS | Clay silty sandy    |  |
| CZV | Clay silty gravelly |  |

|      |                     |  |
|------|---------------------|--|
| SAGR | Sand and gravel     |  |
| SZV  | Sand silty gravelly |  |
| VSZ  | Gravel sandy silty  |  |
| ZS   | Sandy silt          |  |

Table 3 - Explanation of lithological codes used in boreholes to describe the Broomhill Clay

### **Baillieston Till (BNTI-DMTN)**

The Baillieston Till Formation is only present in a small portion of the section and again may not make an appearance in your borehole set. It lies directly on the bedrock and the typical lithology is a glacially organised diamicton composed of isolated boulders, gravel and pebbles in matrix of sandy silty clay.

|      |                           |  |
|------|---------------------------|--|
| CZSV | Clay silty sandy bouldery |  |
|------|---------------------------|--|

Table 4 - Explanation of lithological codes used in boreholes to describe the Baillieston Till

### **Bedrock**

The following table is a list of all of the lithologies present below the rockhead. For the purposes of this experiment the top of any of these units present in a borehole should be taken as the rockhead.

|        |                        |  |
|--------|------------------------|--|
| CMDST  | Carbonaceous Mudstone  |  |
| COAL   | Coal                   |  |
| CSLST  | Carbonaceous Siltstone |  |
| MCOLGB | Olivine-microgabbro    |  |
| MDST   | Mudstone               |  |
| SDST   | Sandstone              |  |
| SEAT   | Olivine-microgabbro    |  |
| SEATC  | Seatearth claystone    |  |
| SHFEST | Shelly Ironstone       |  |
| SHMDST | Shelly mudstone        |  |
| SLMDST | Silty mudstone         |  |
| SLST   | Siltstone              |  |
| SLSST  | Silty sandstone        |  |

Table 5 - Explanation of lithological codes used in boreholes to describe the bedrock

## Glasgow Situations – All at 5x vertical exaggeration

### Situation 1:

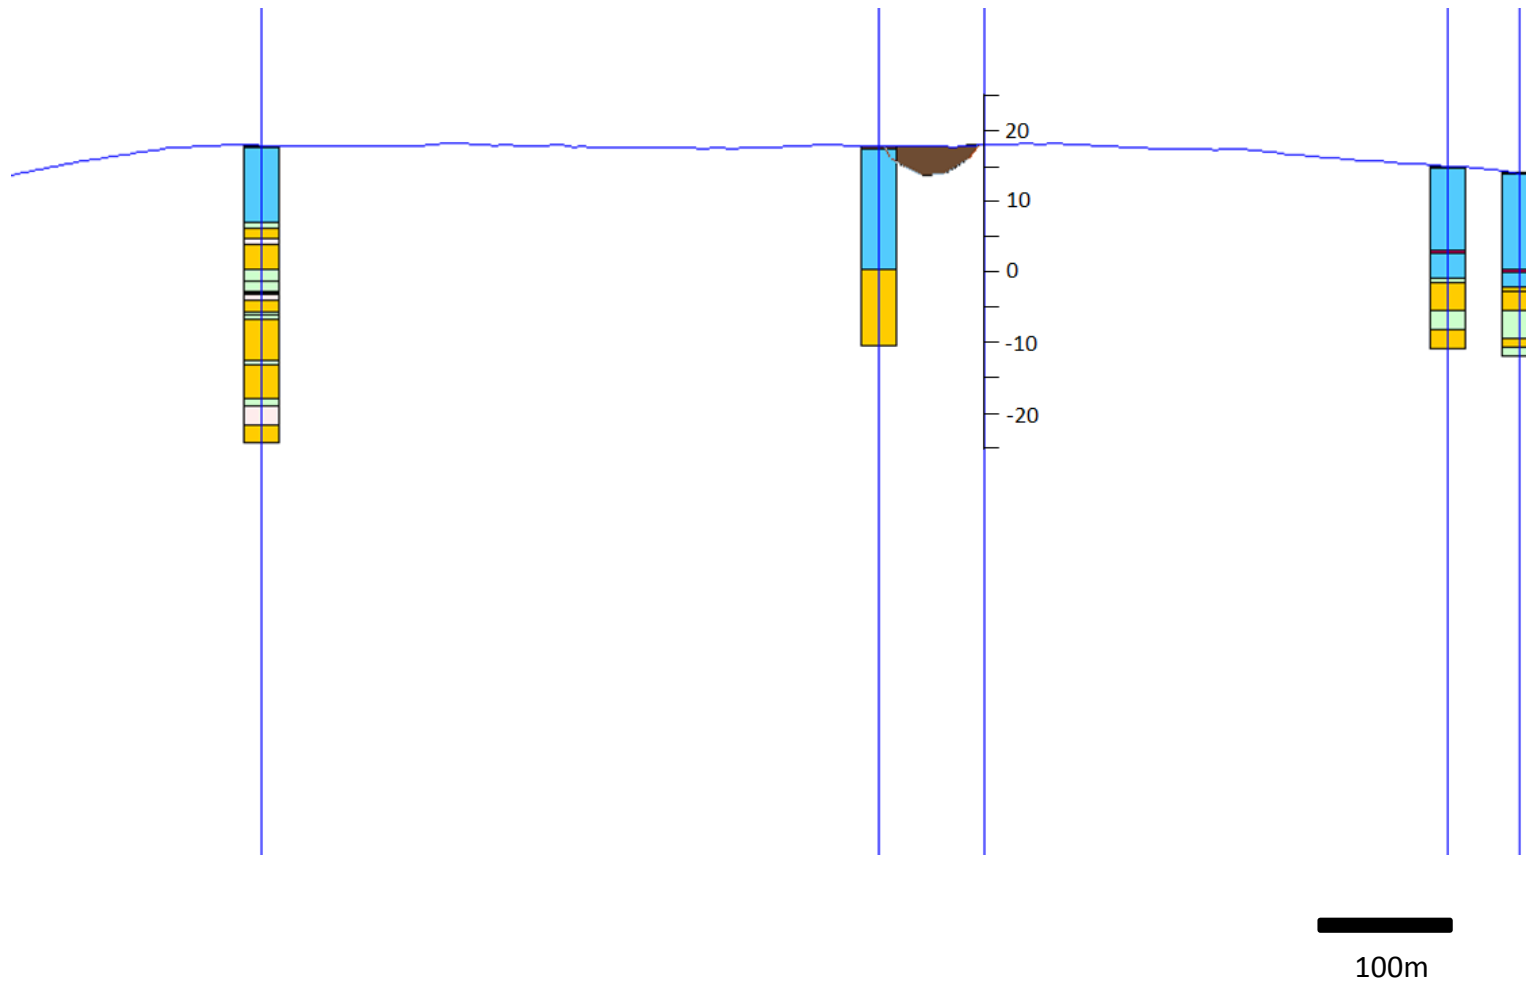

Situation 2:

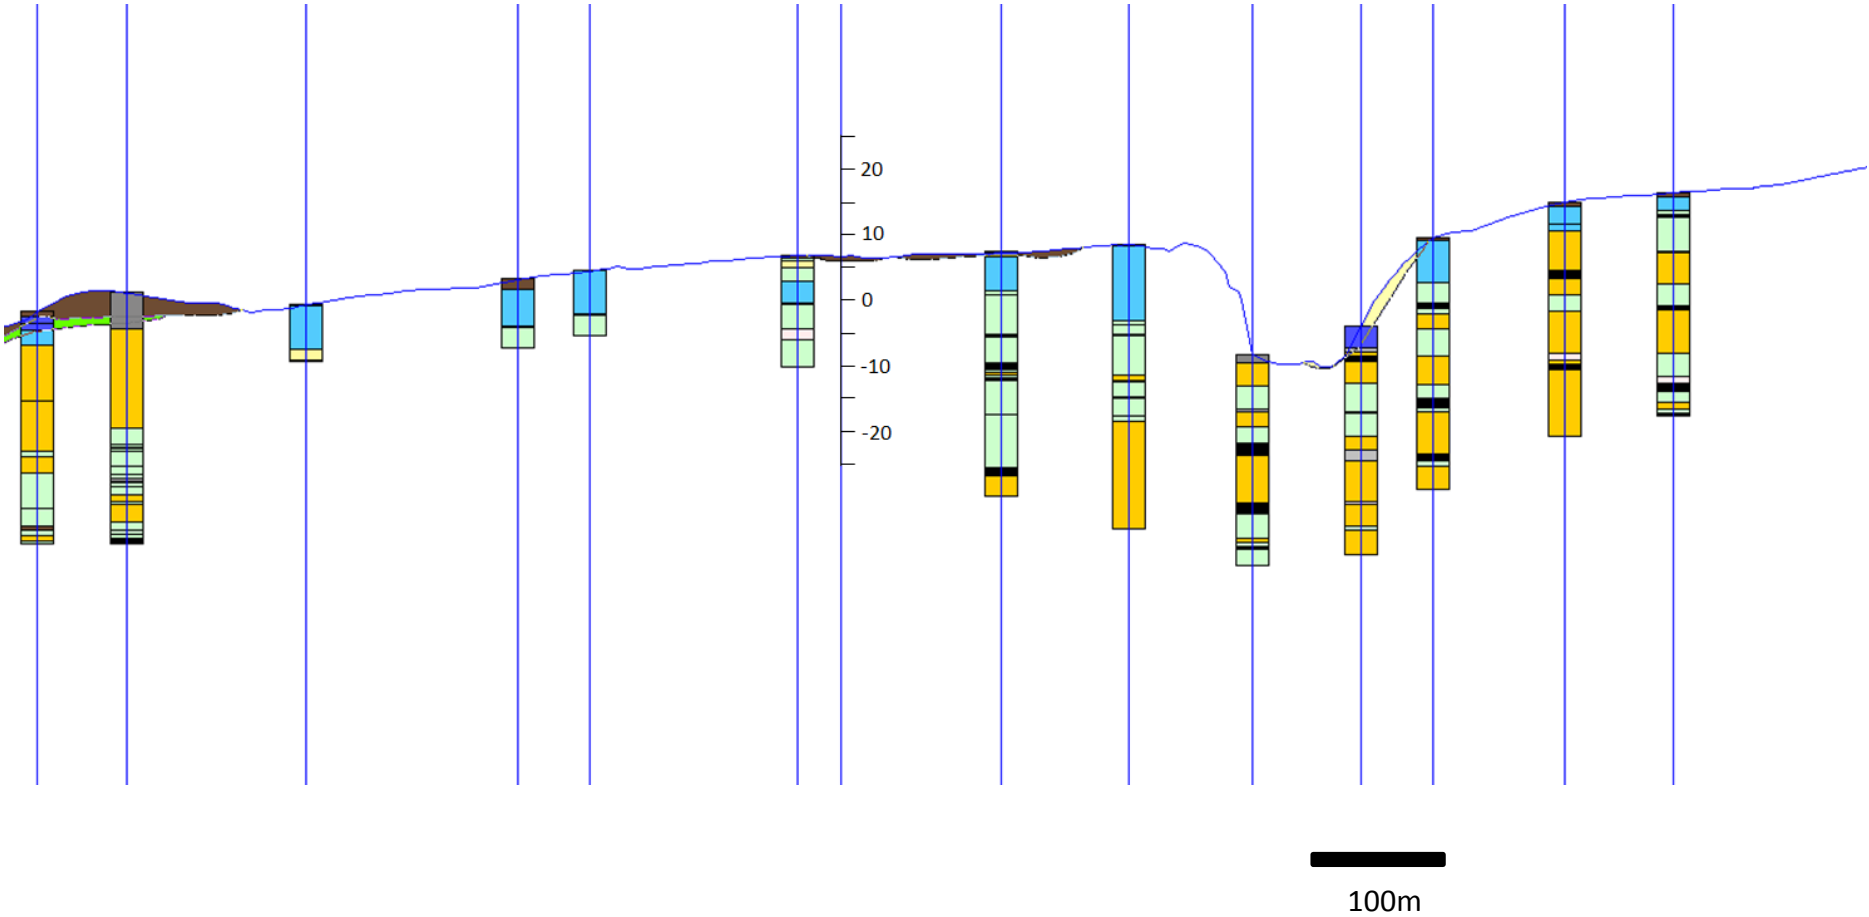

Situation 3:

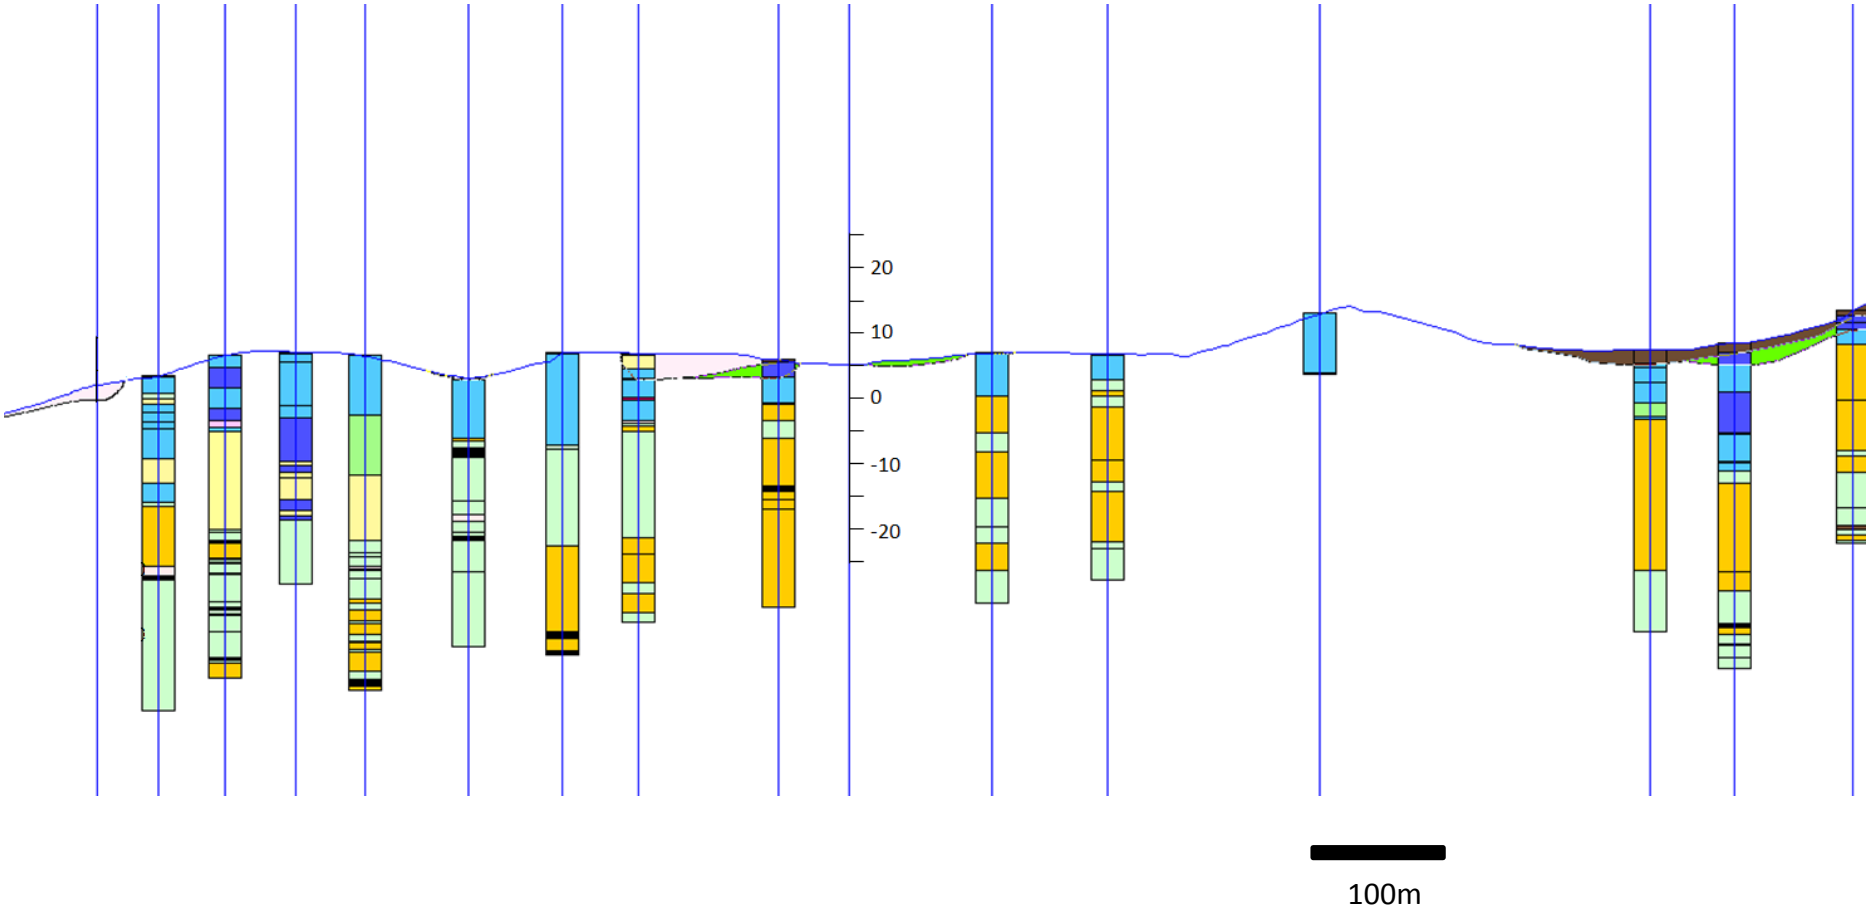

Situation 4:

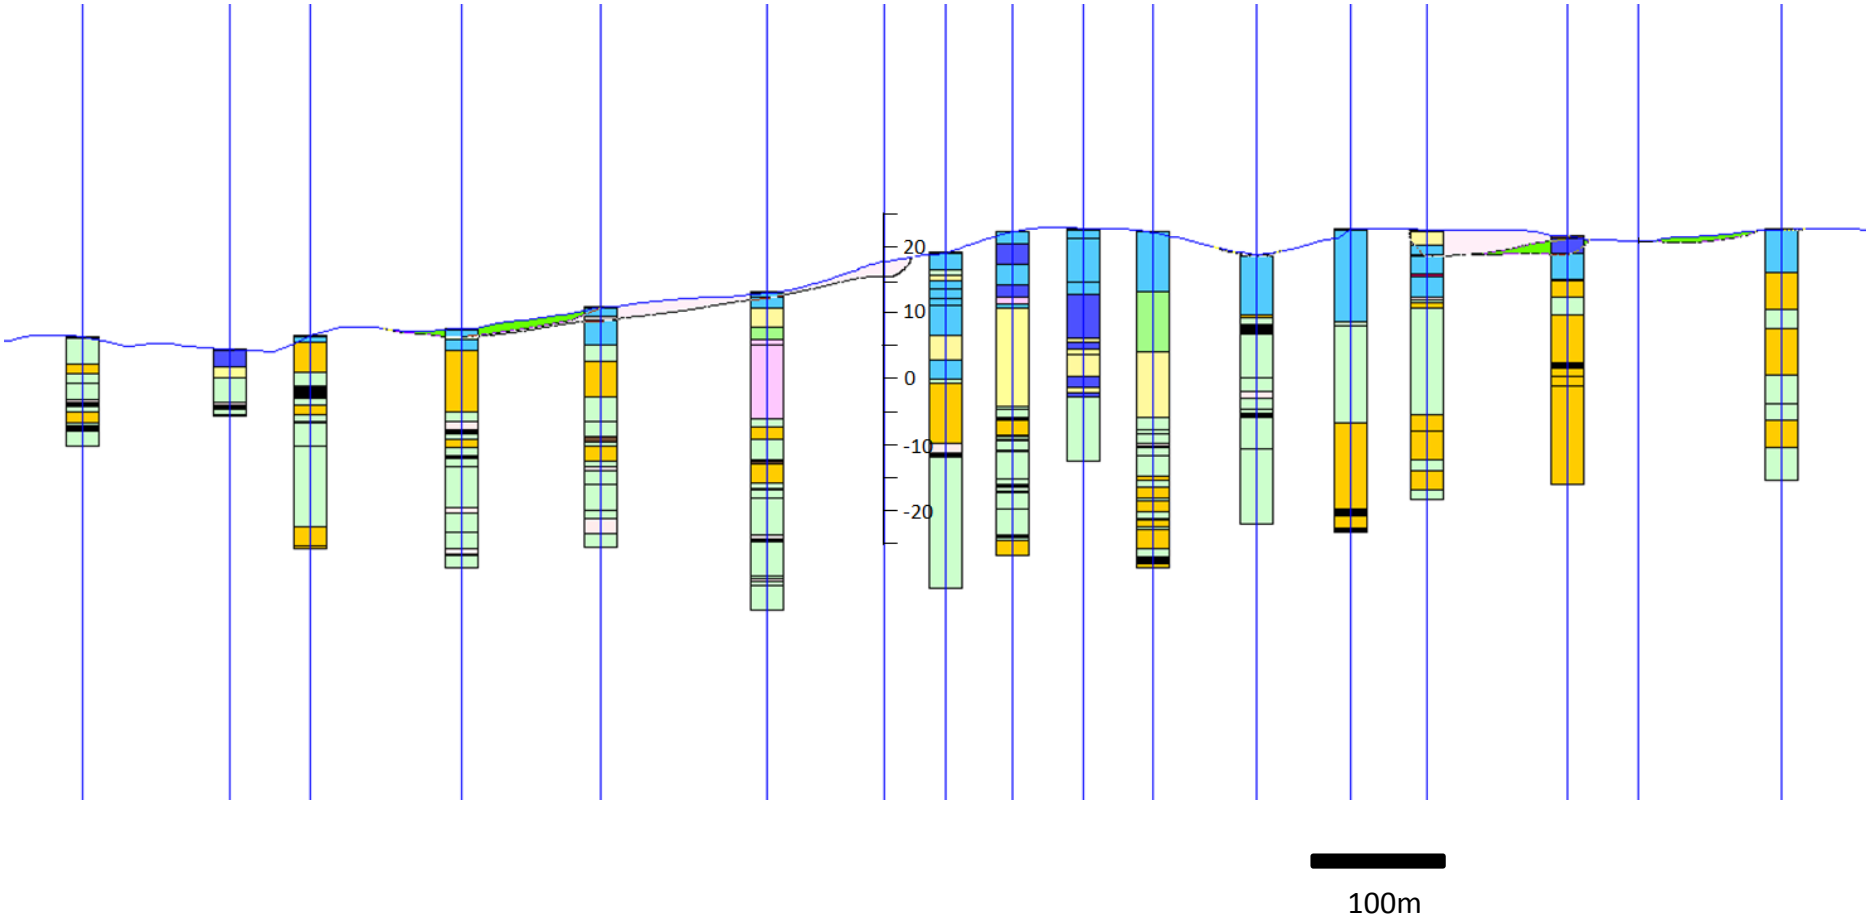

Situation 5:

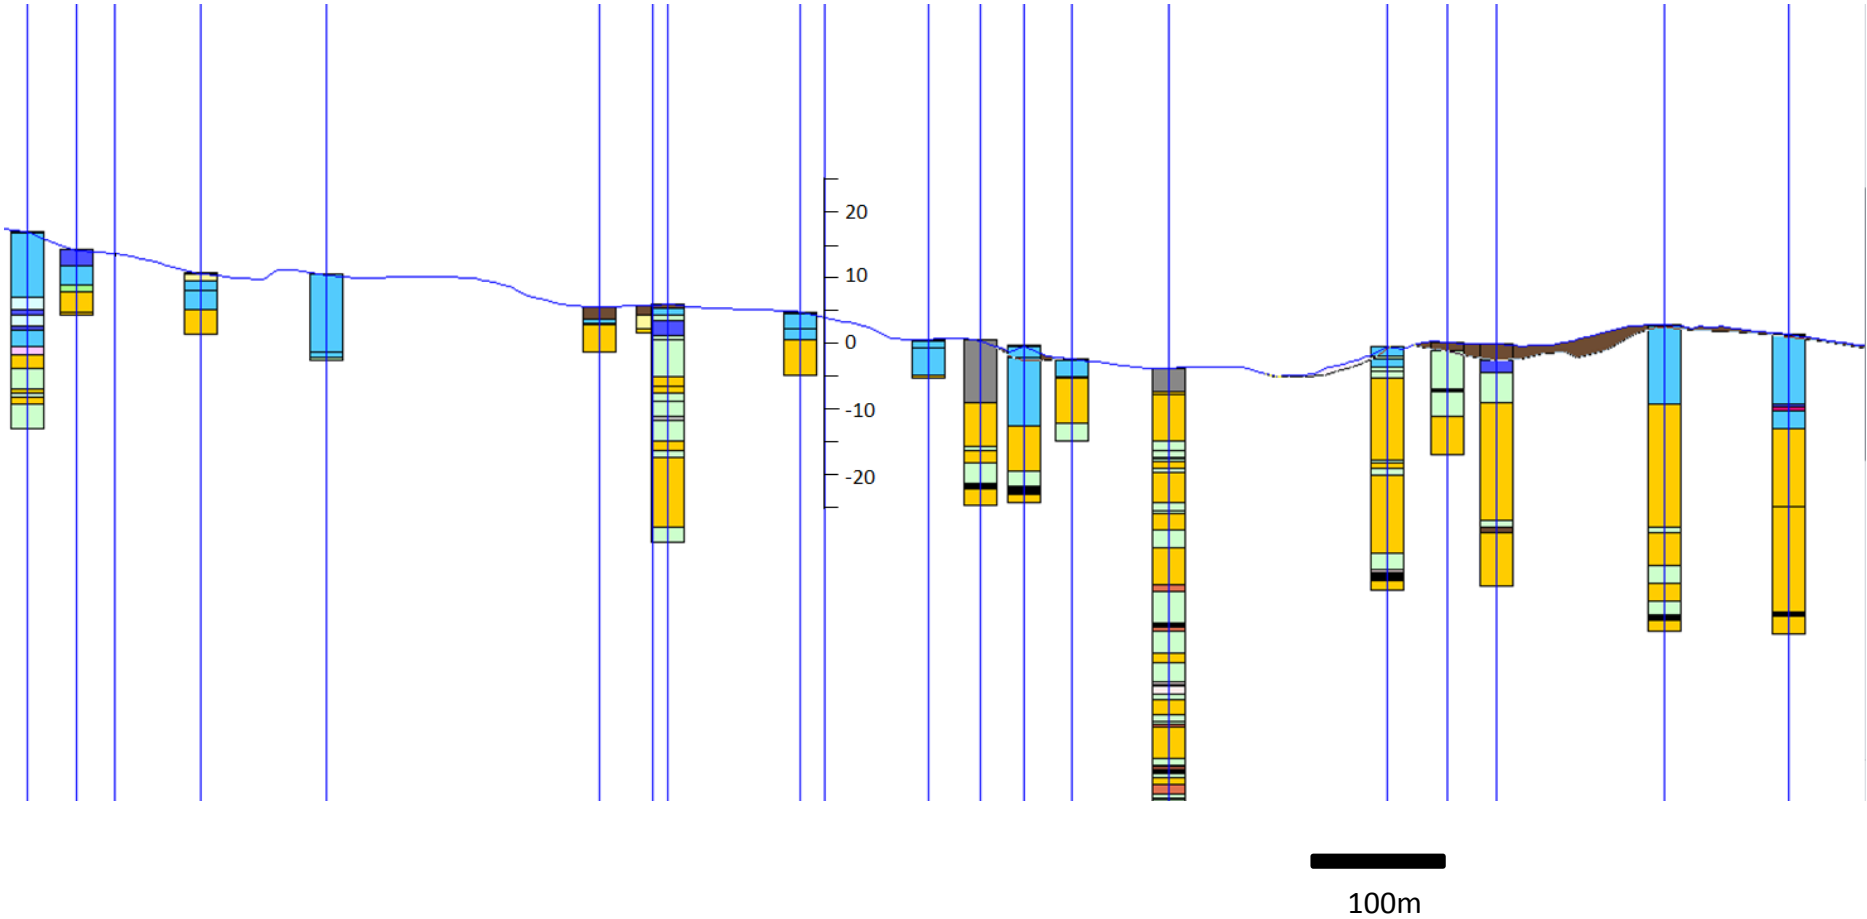



Situation 6:

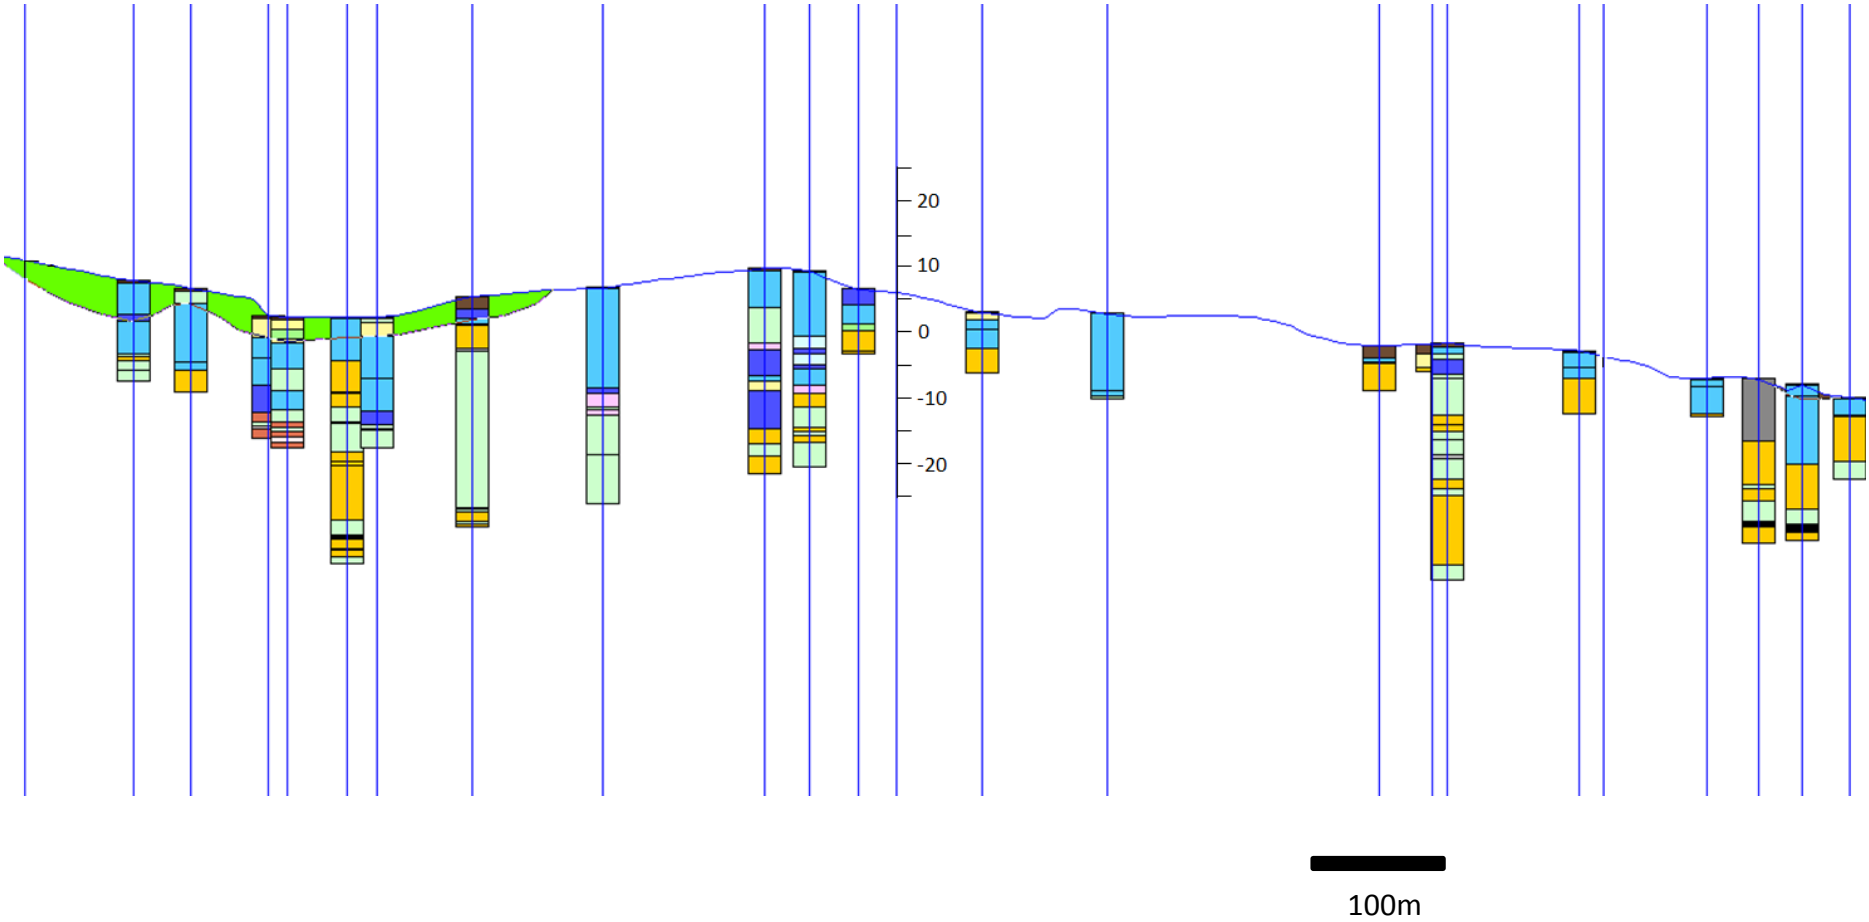

Situation 7:

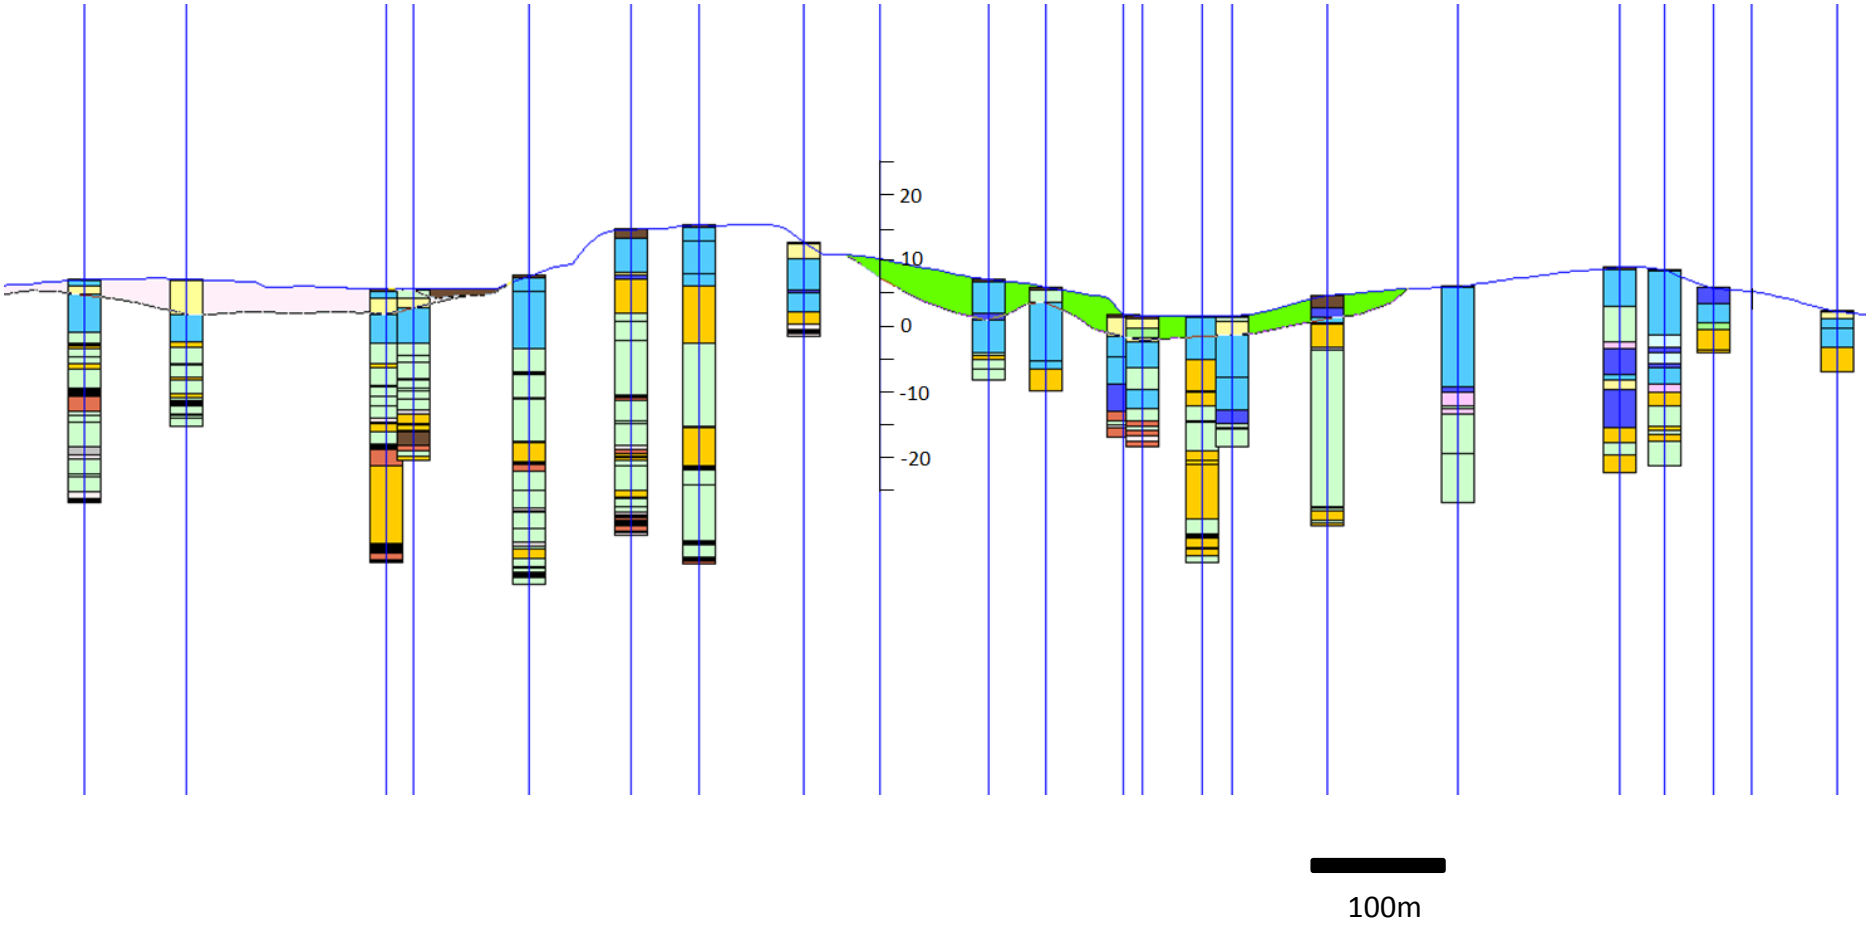

## Situation 8:

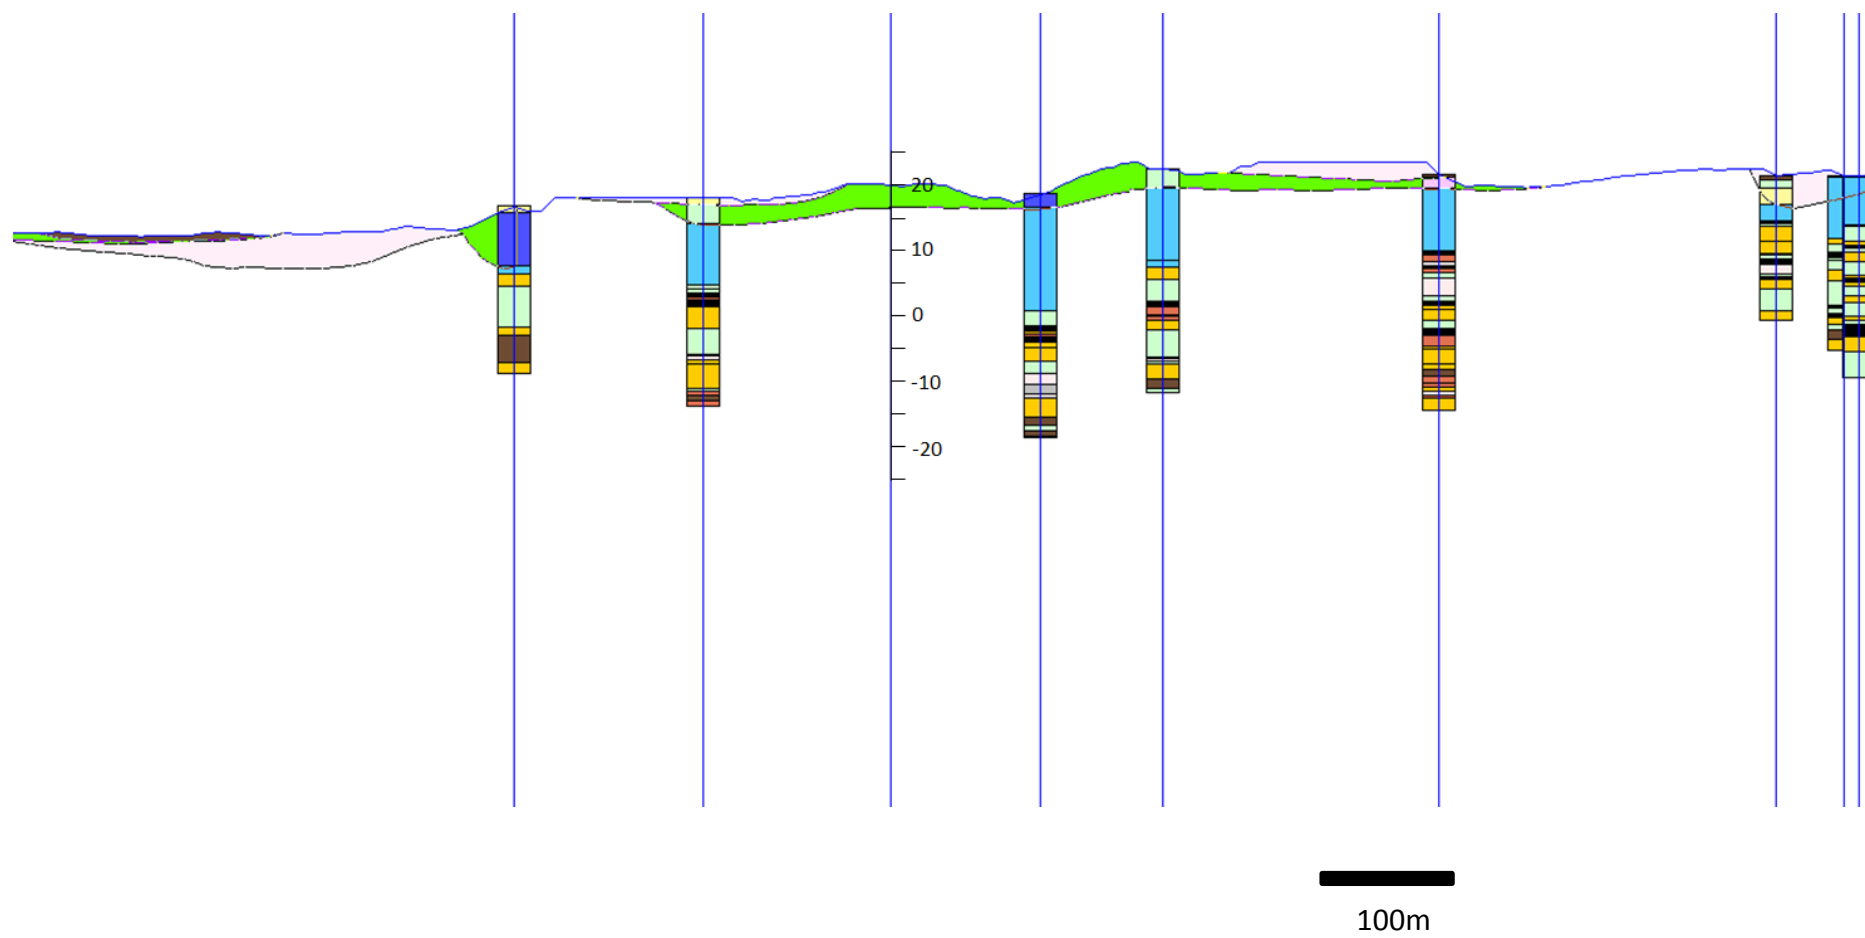

Situation 9:

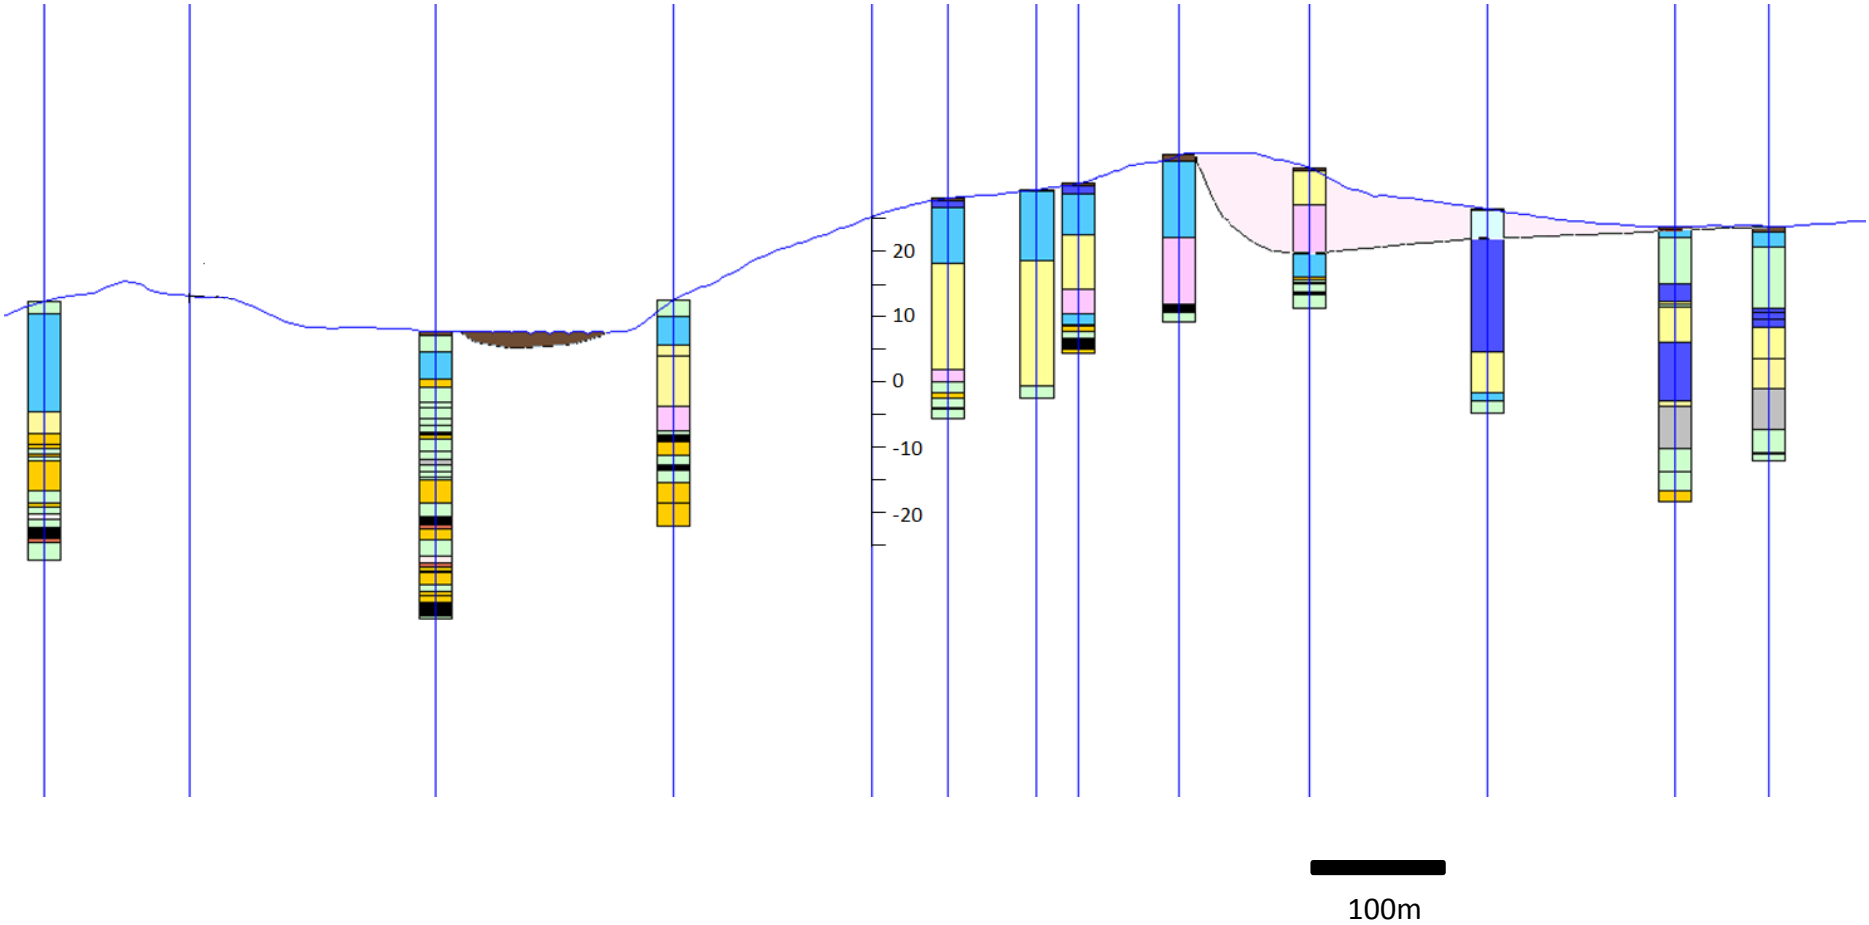

Situation 10:

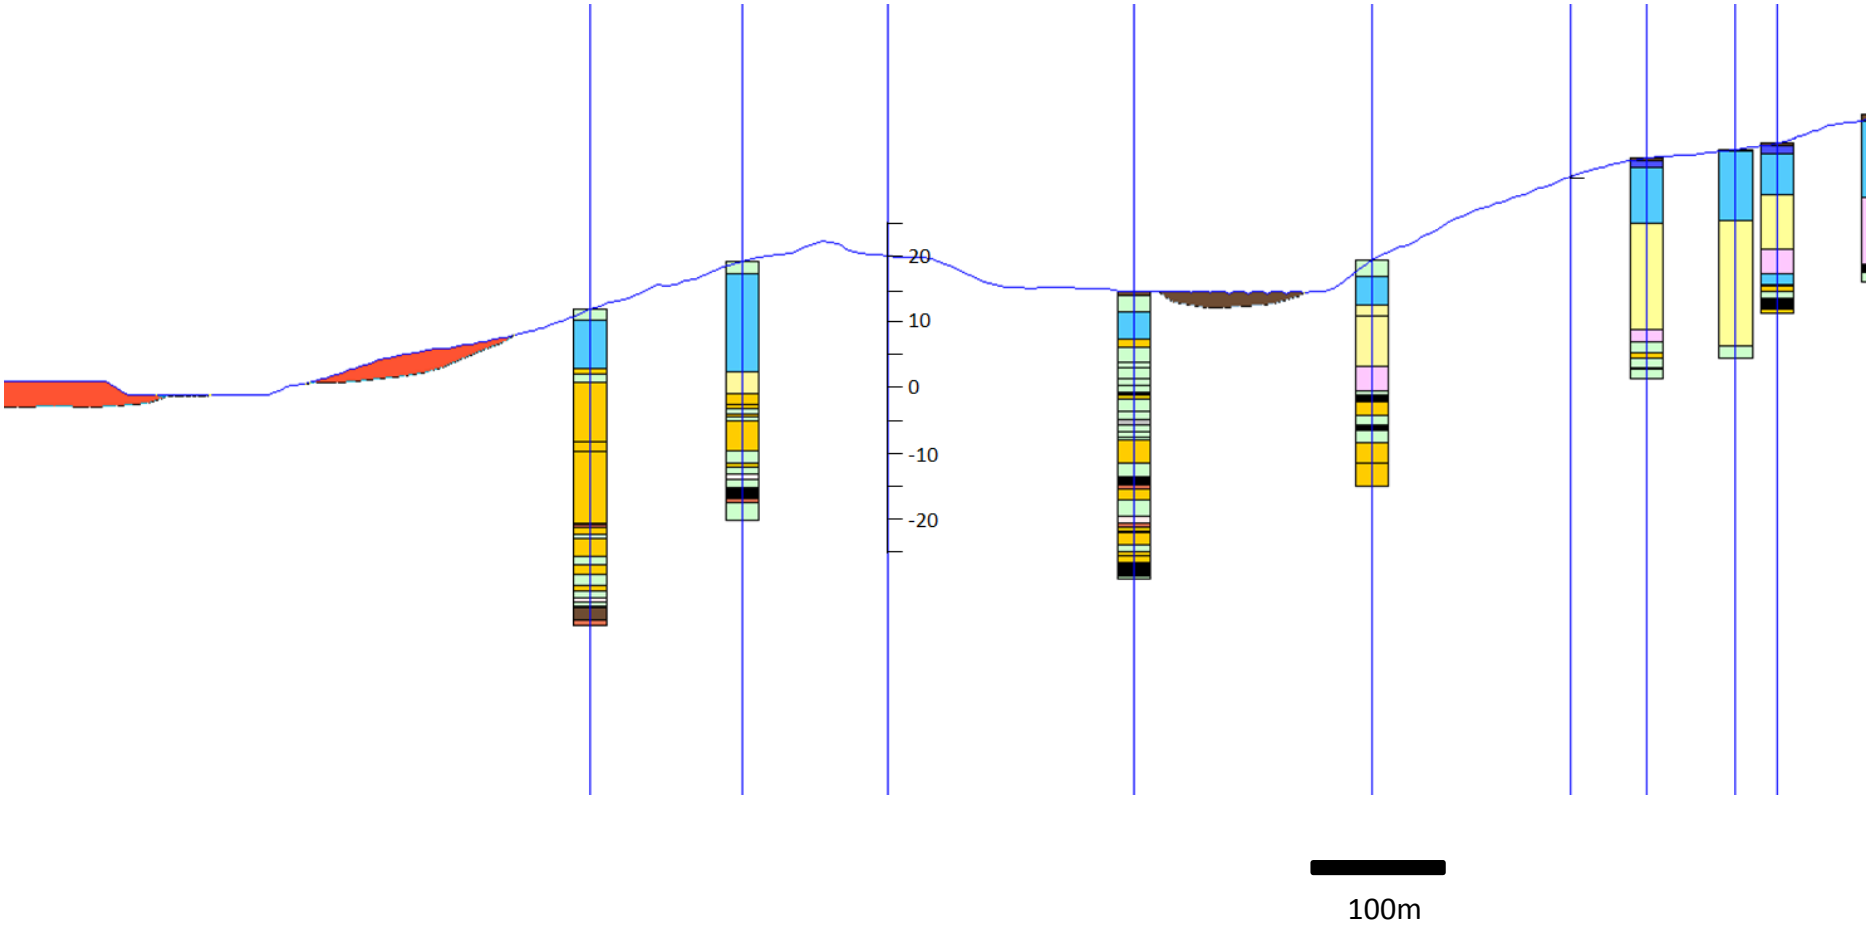

Situation 11:

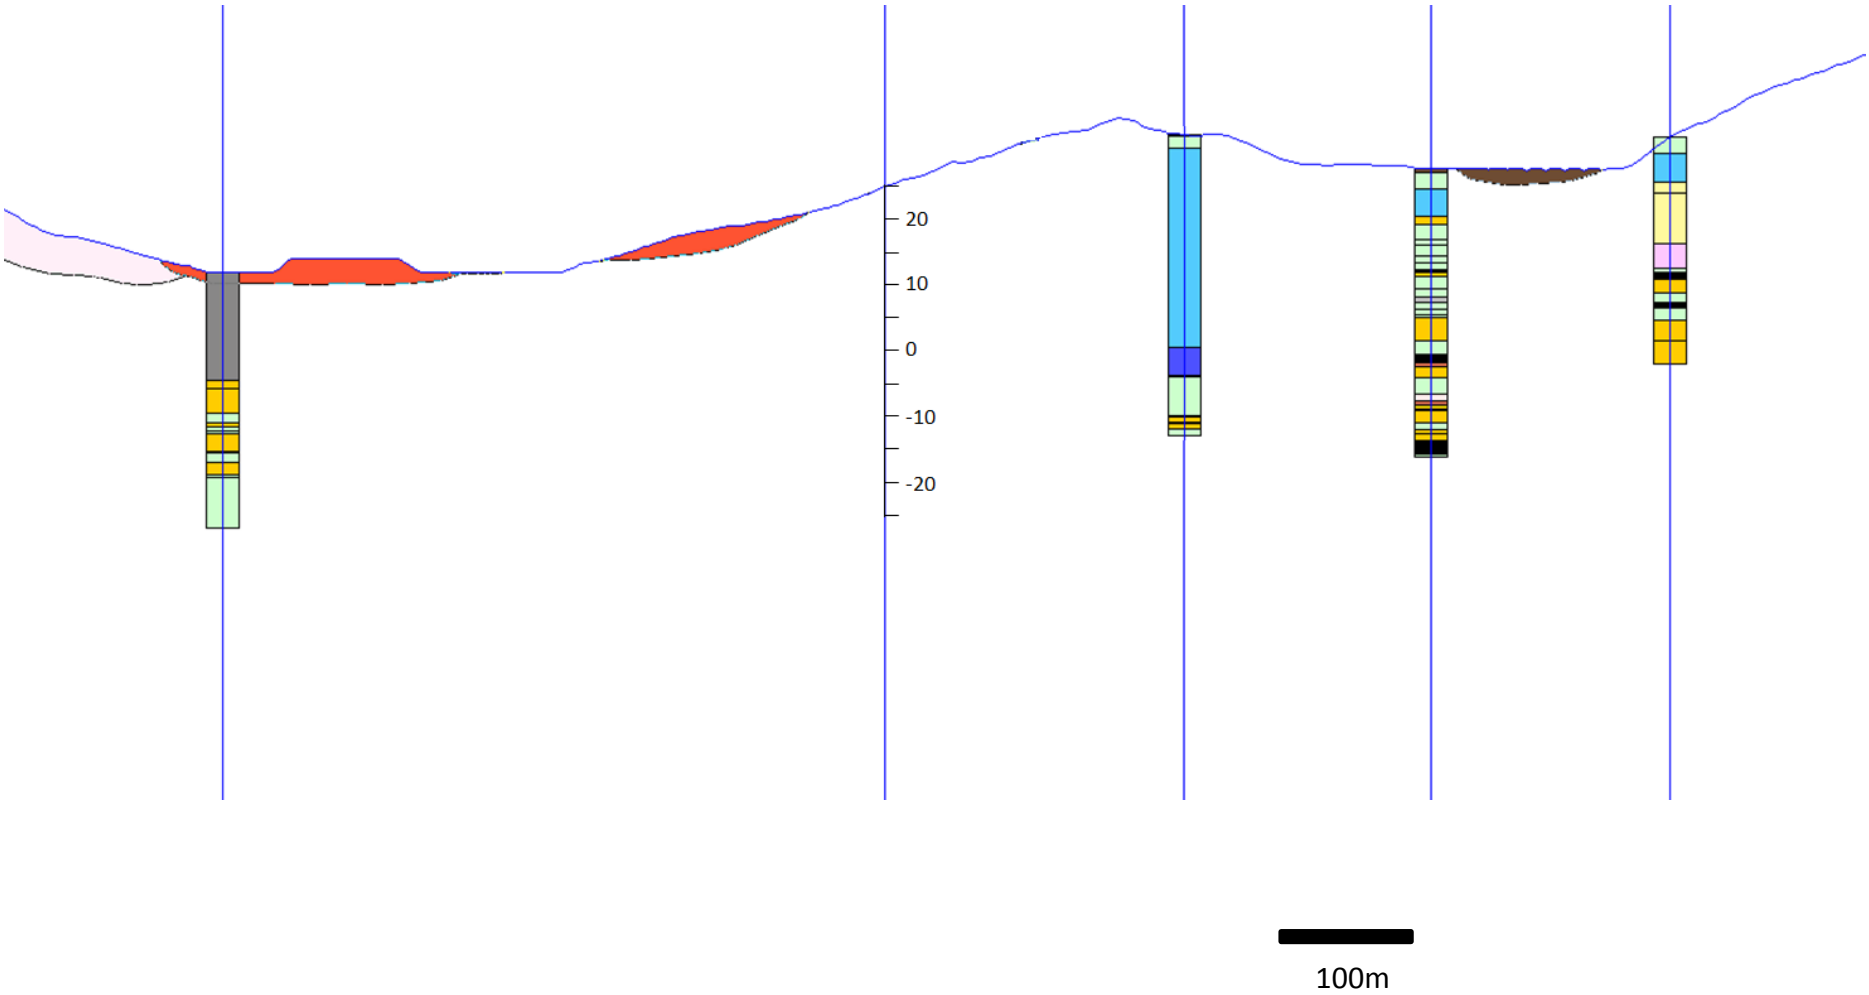

# Manchester Situations – all at x10 vertical exaggeration

## Situation 1:

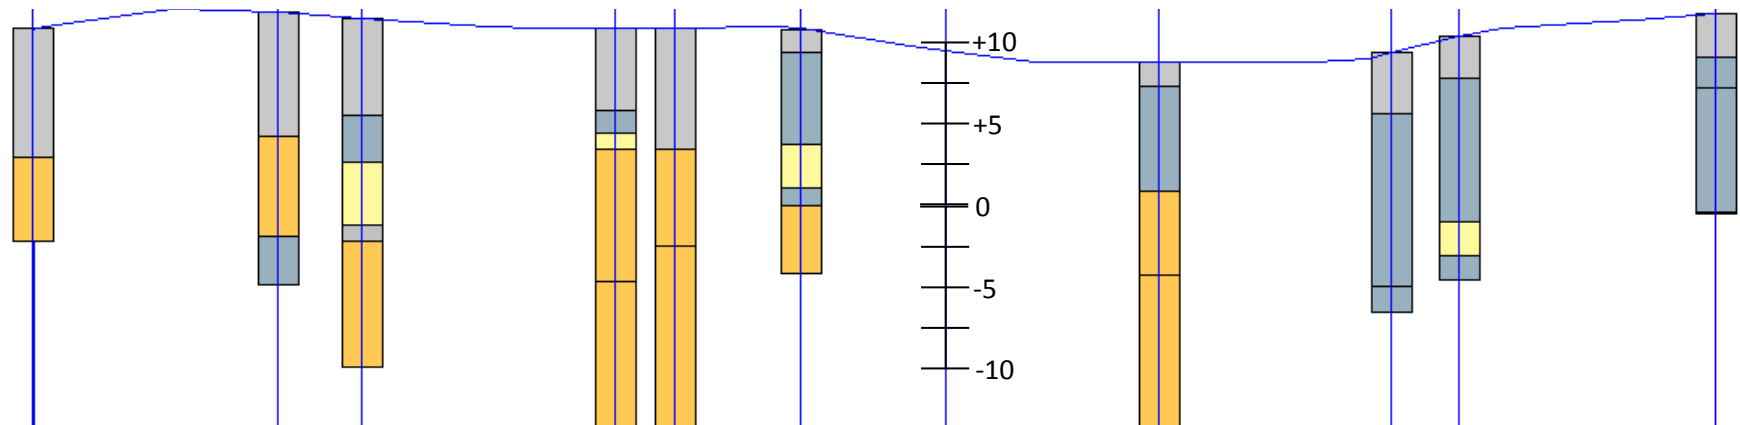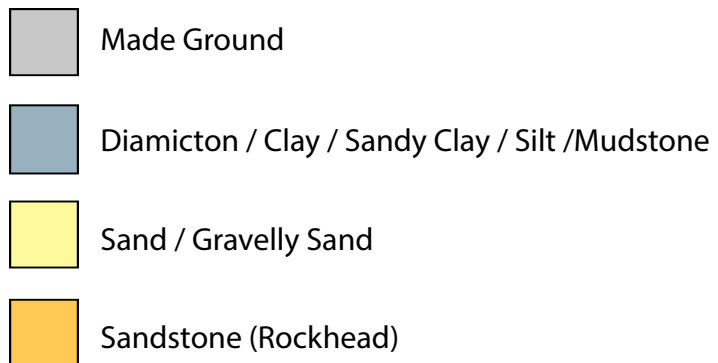

100m

## Situation 2:

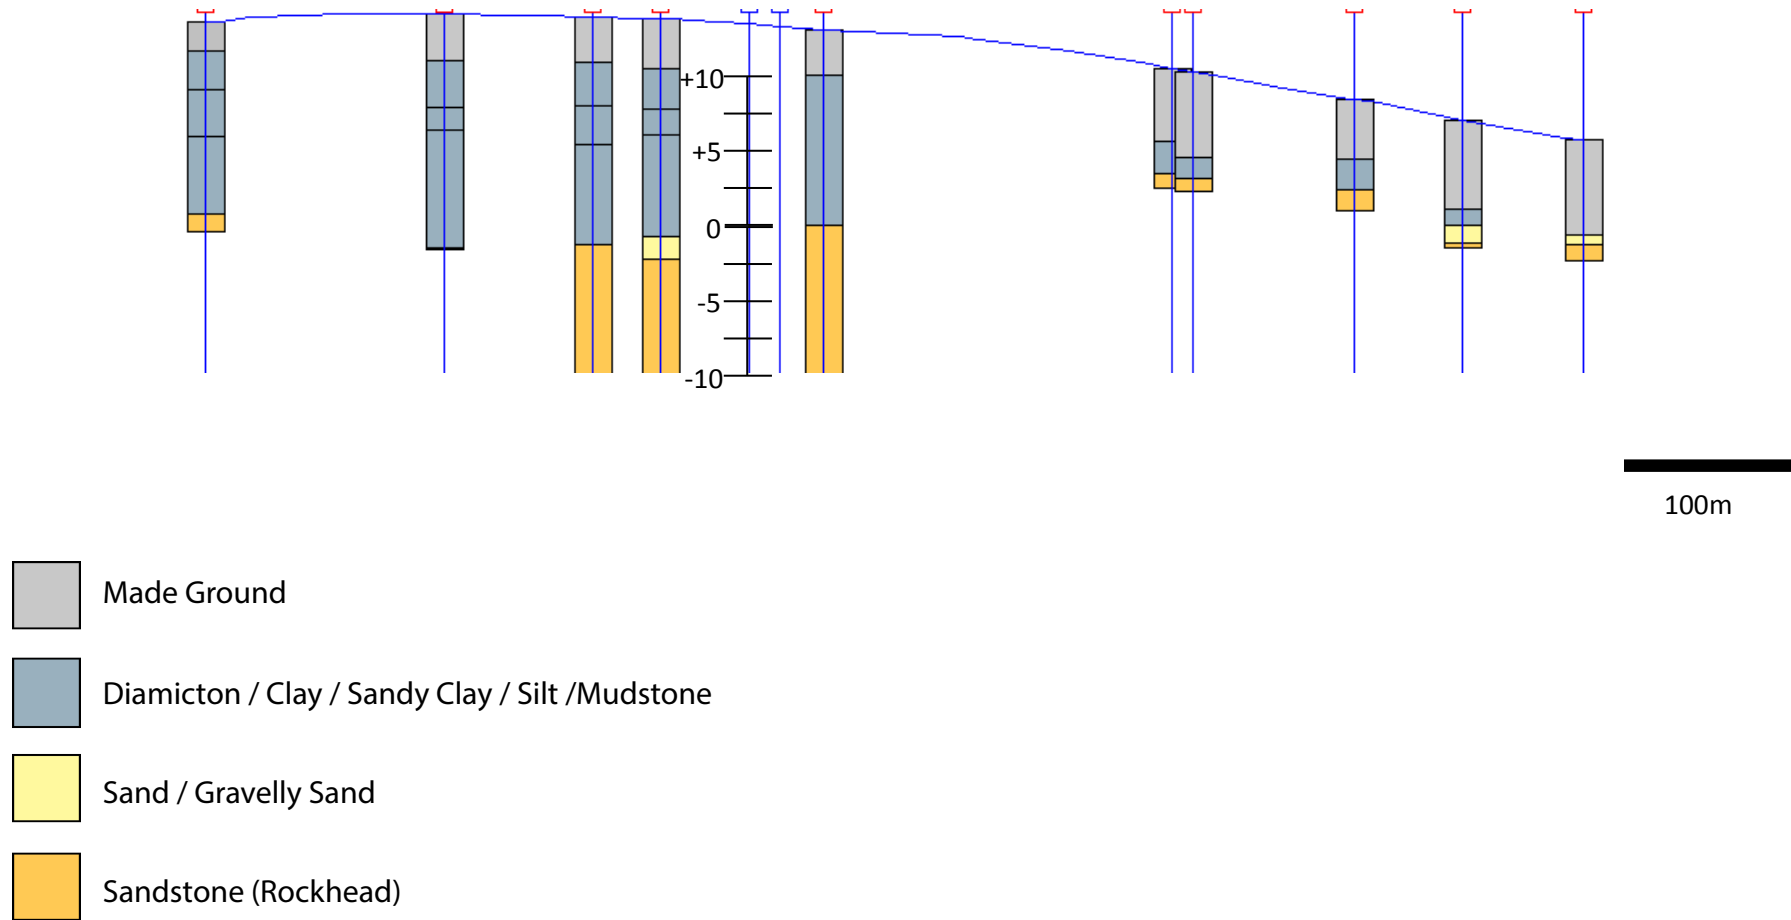



Situation 3:

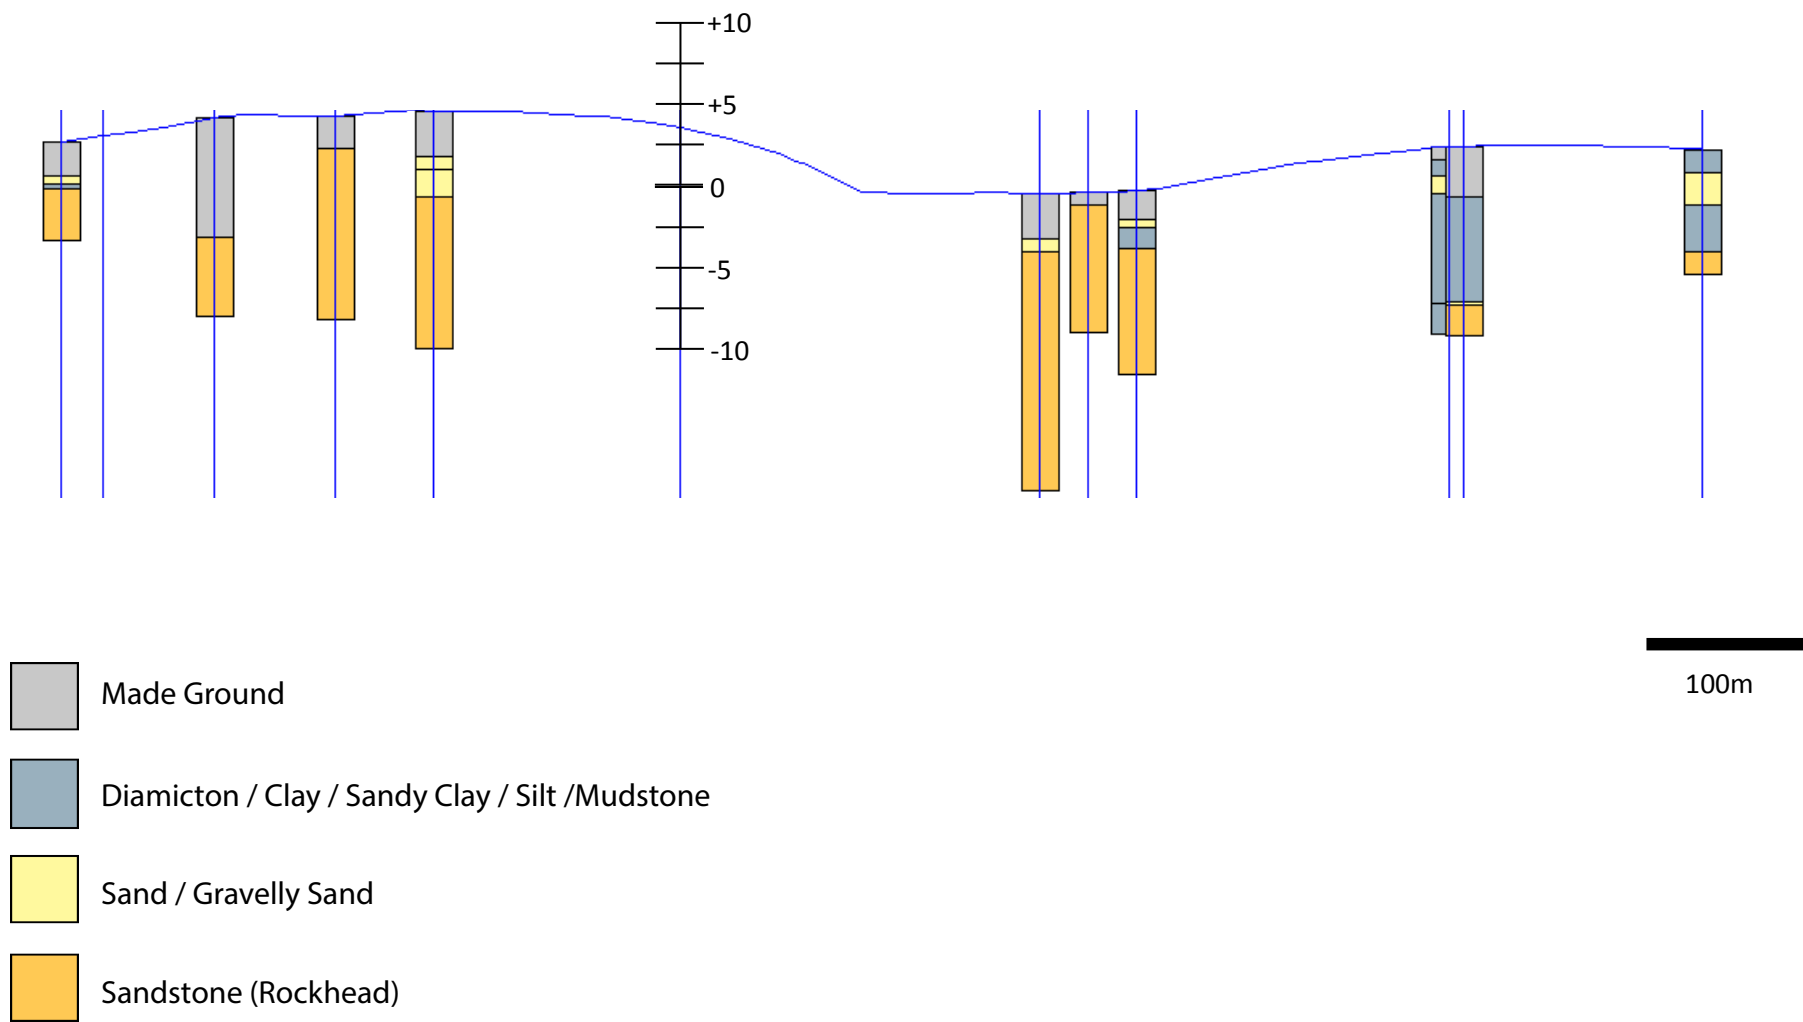

Situation 4:

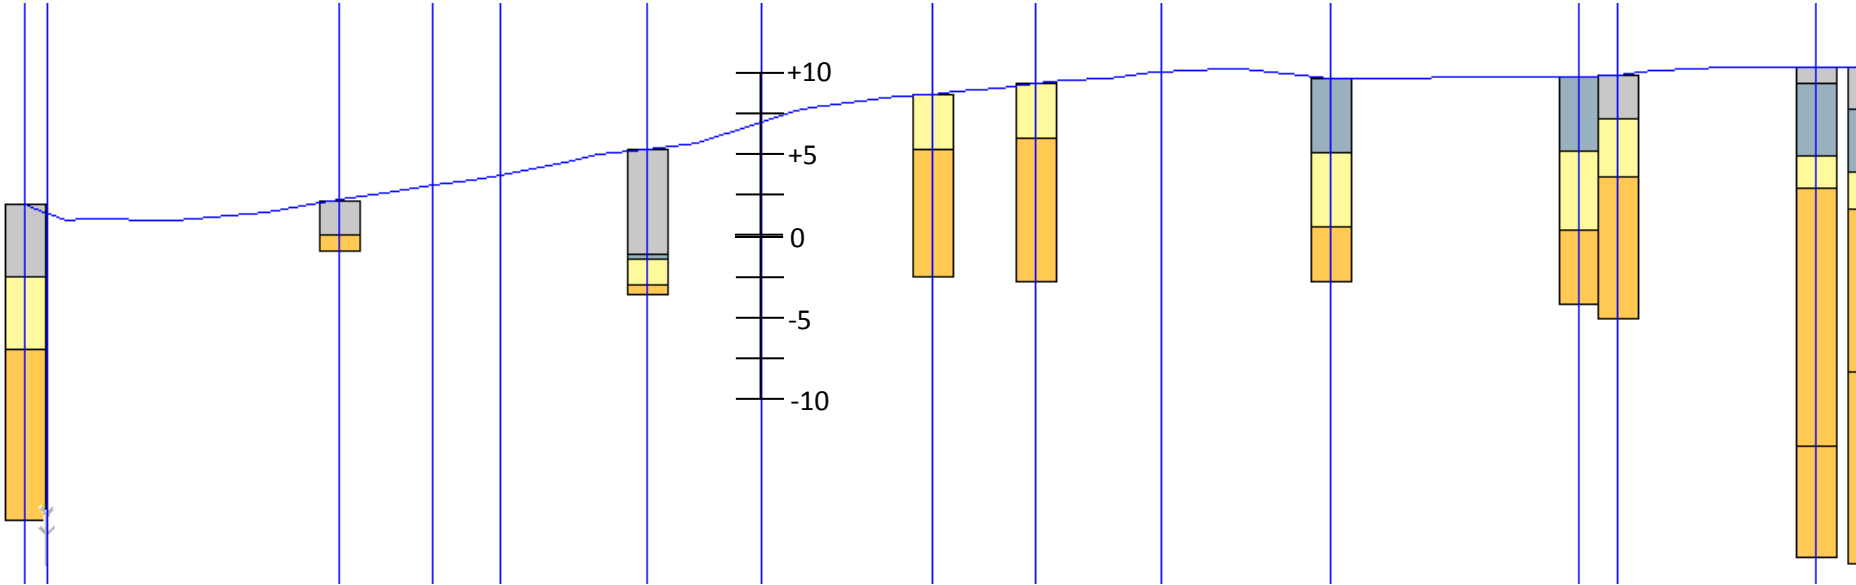

- Made Ground
- Diamicton / Clay / Sandy Clay / Silt / Mudstone
- Sand / Gravelly Sand
- Sandstone (Rockhead)

100m

## Situations 5 and 6:

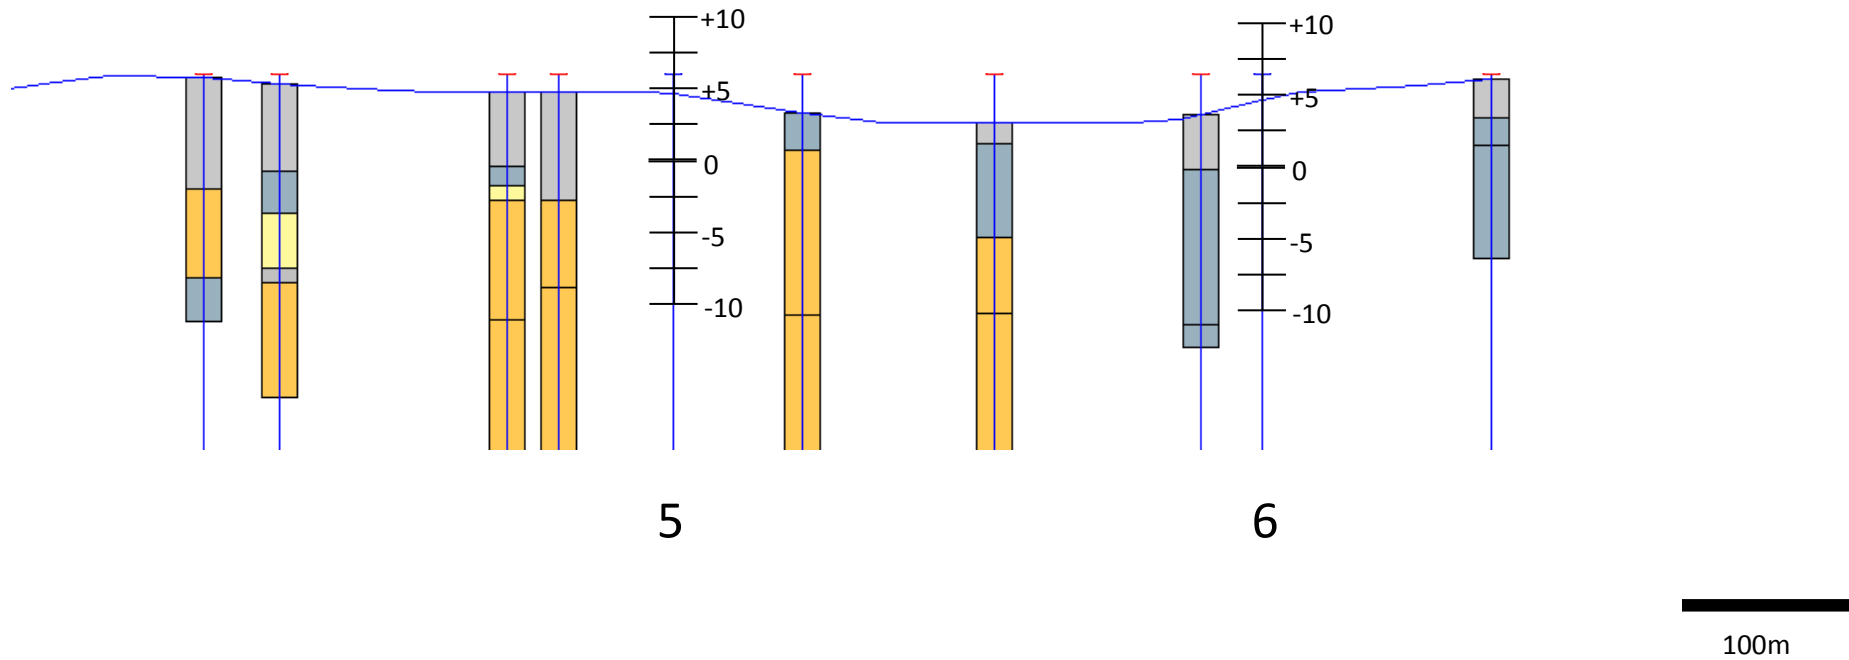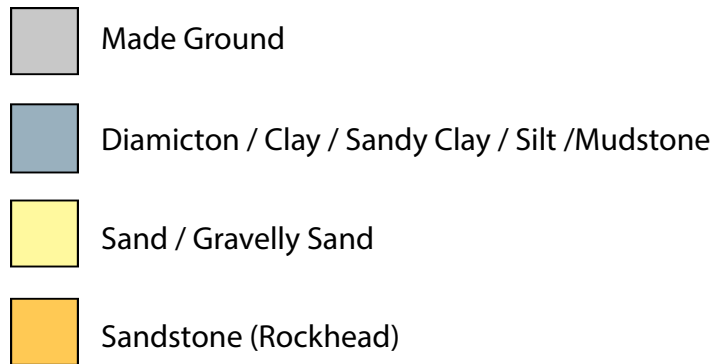

## Situation 7:

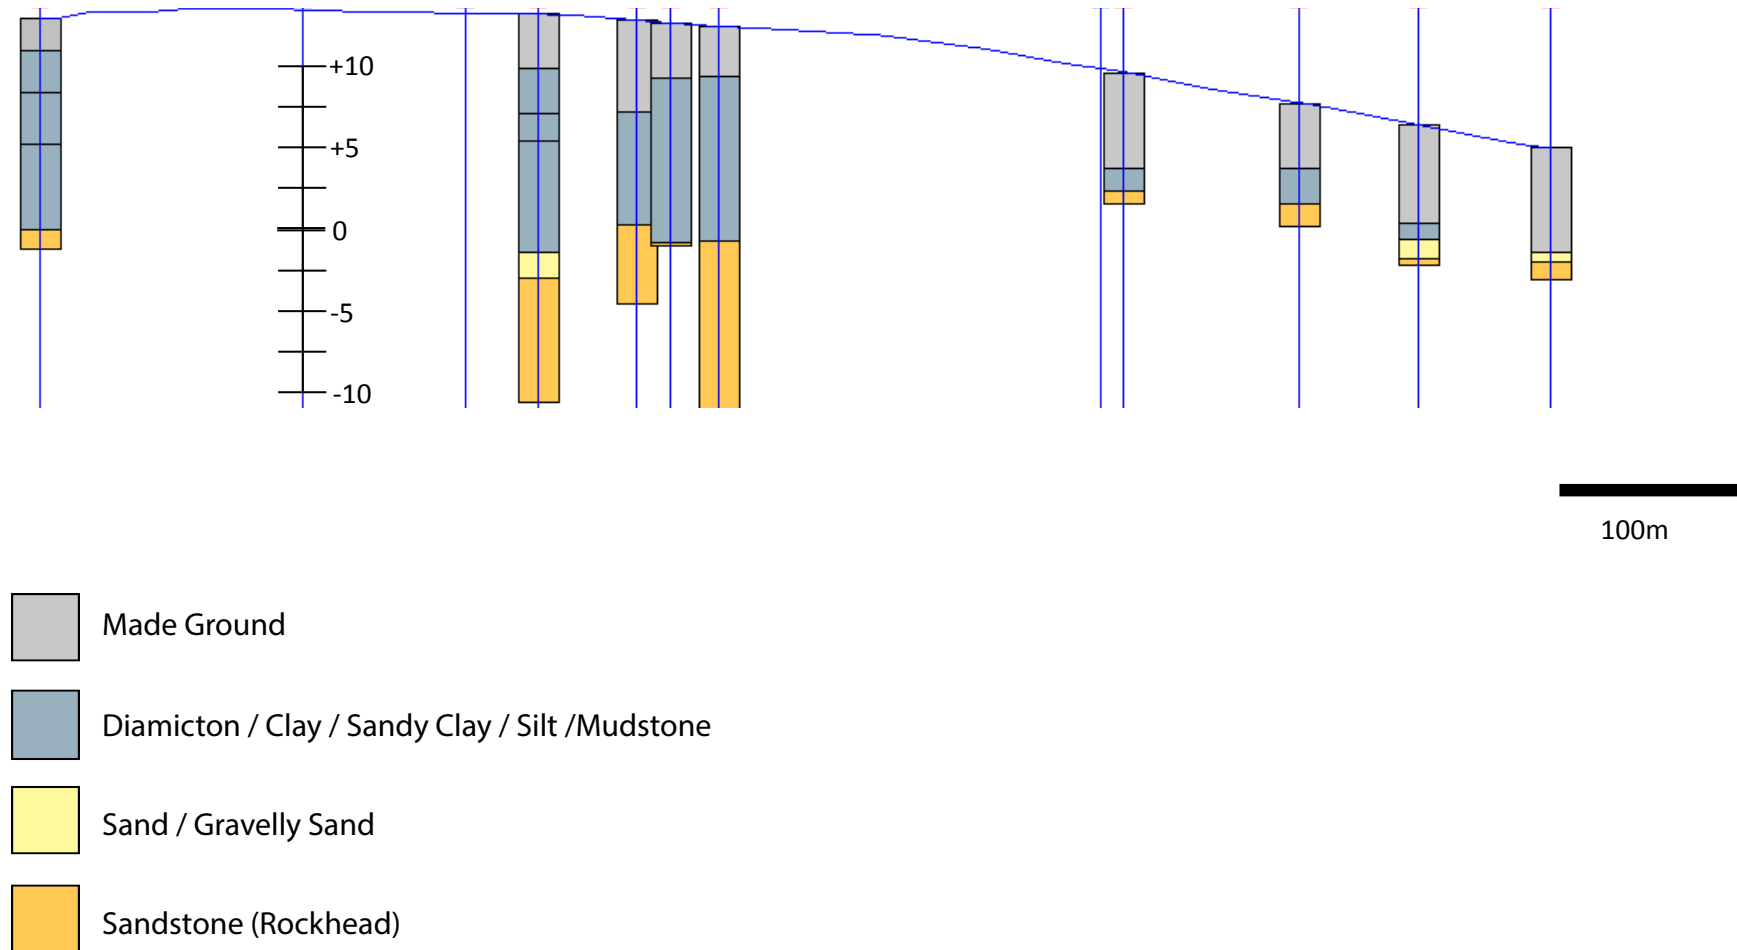

## Situation 8:

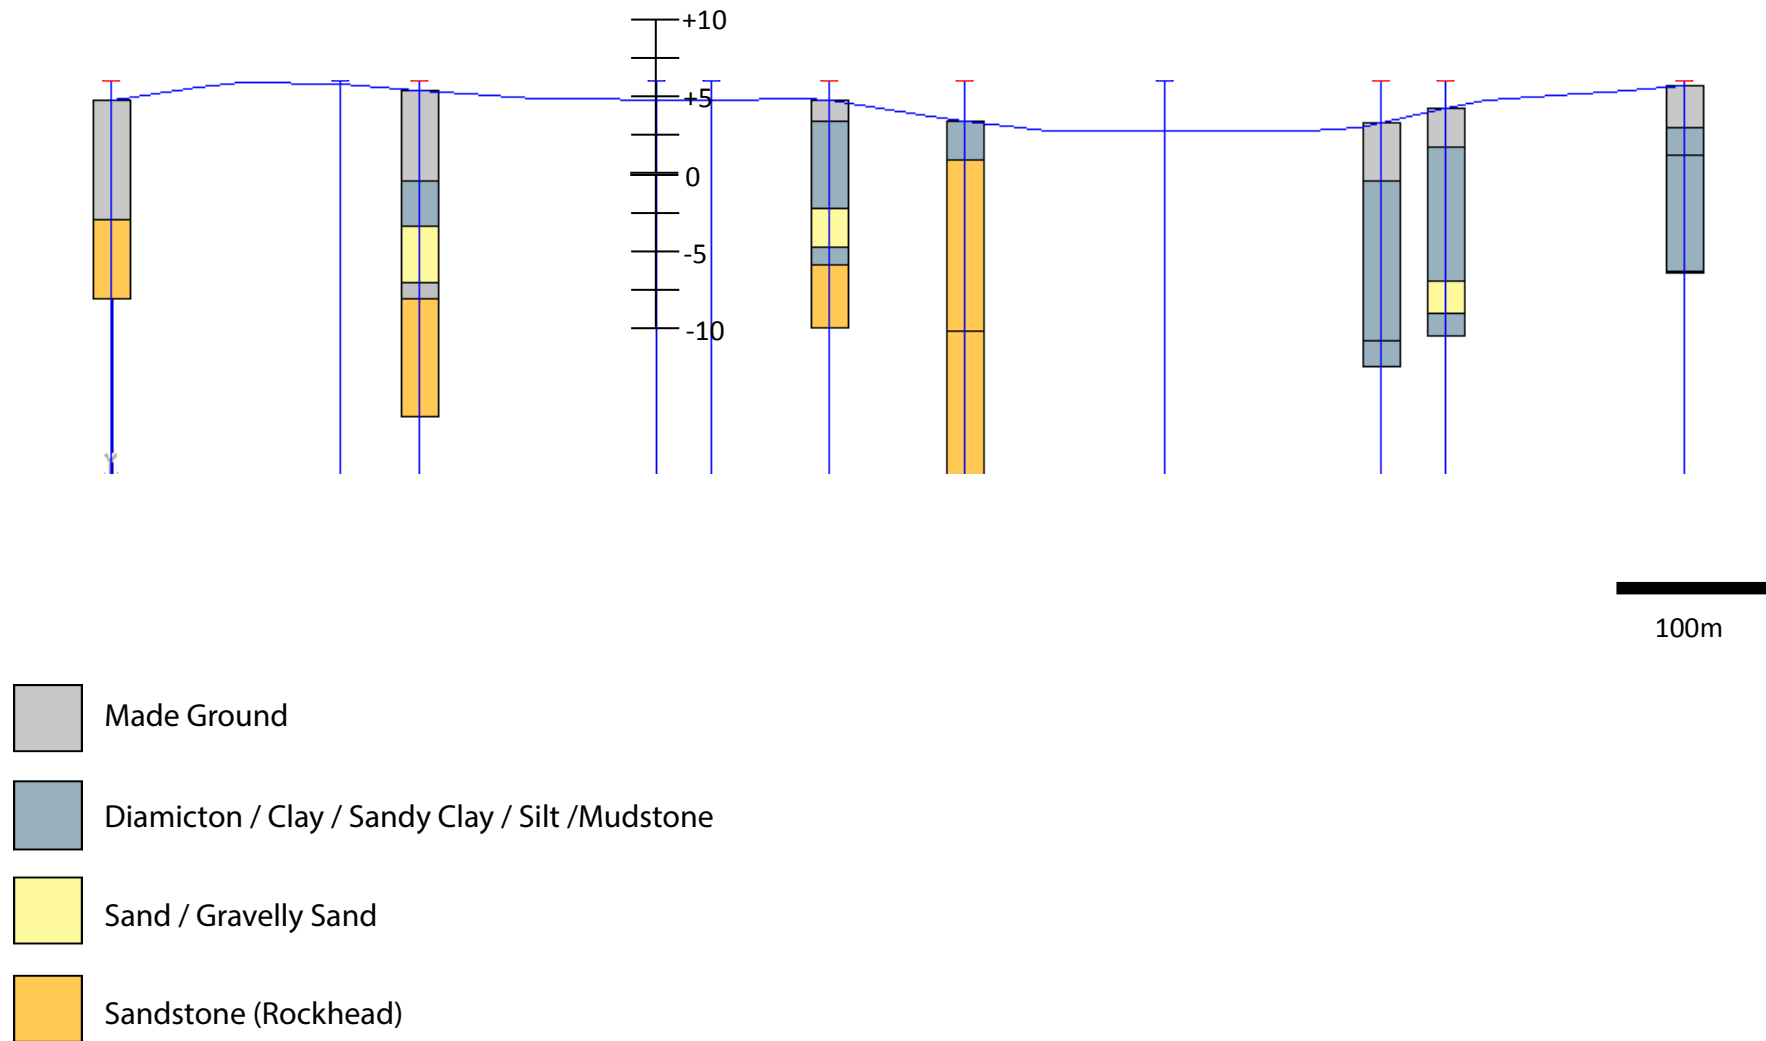

Situation 9:

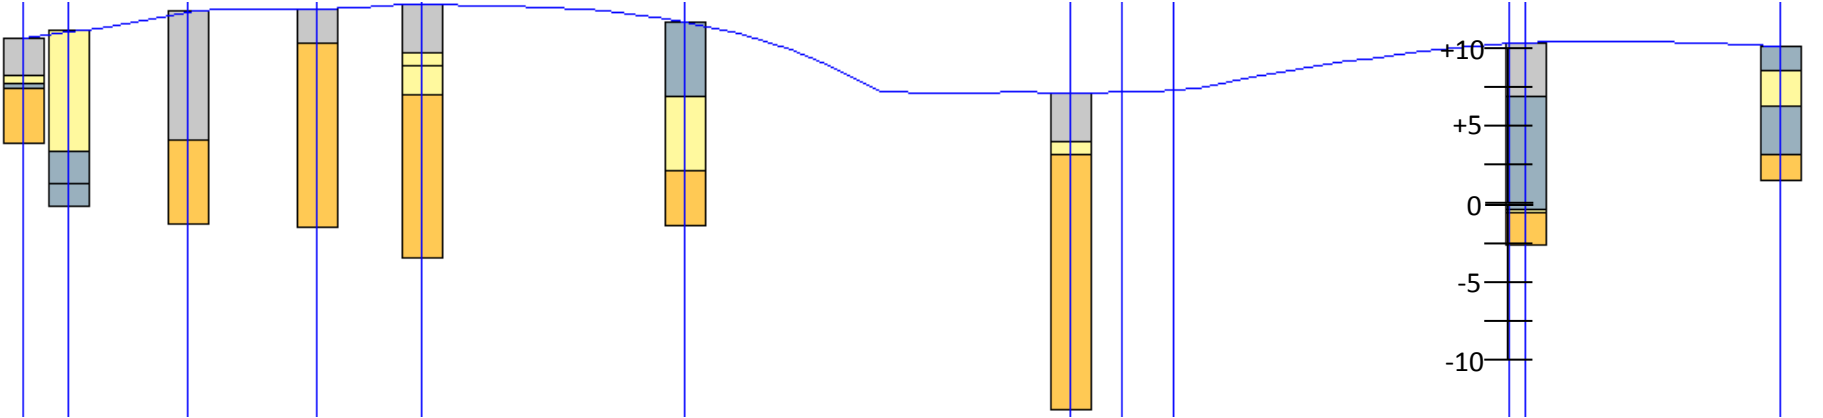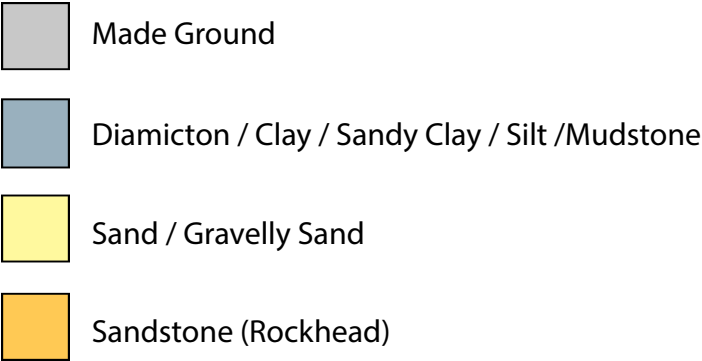

## Situation 10:

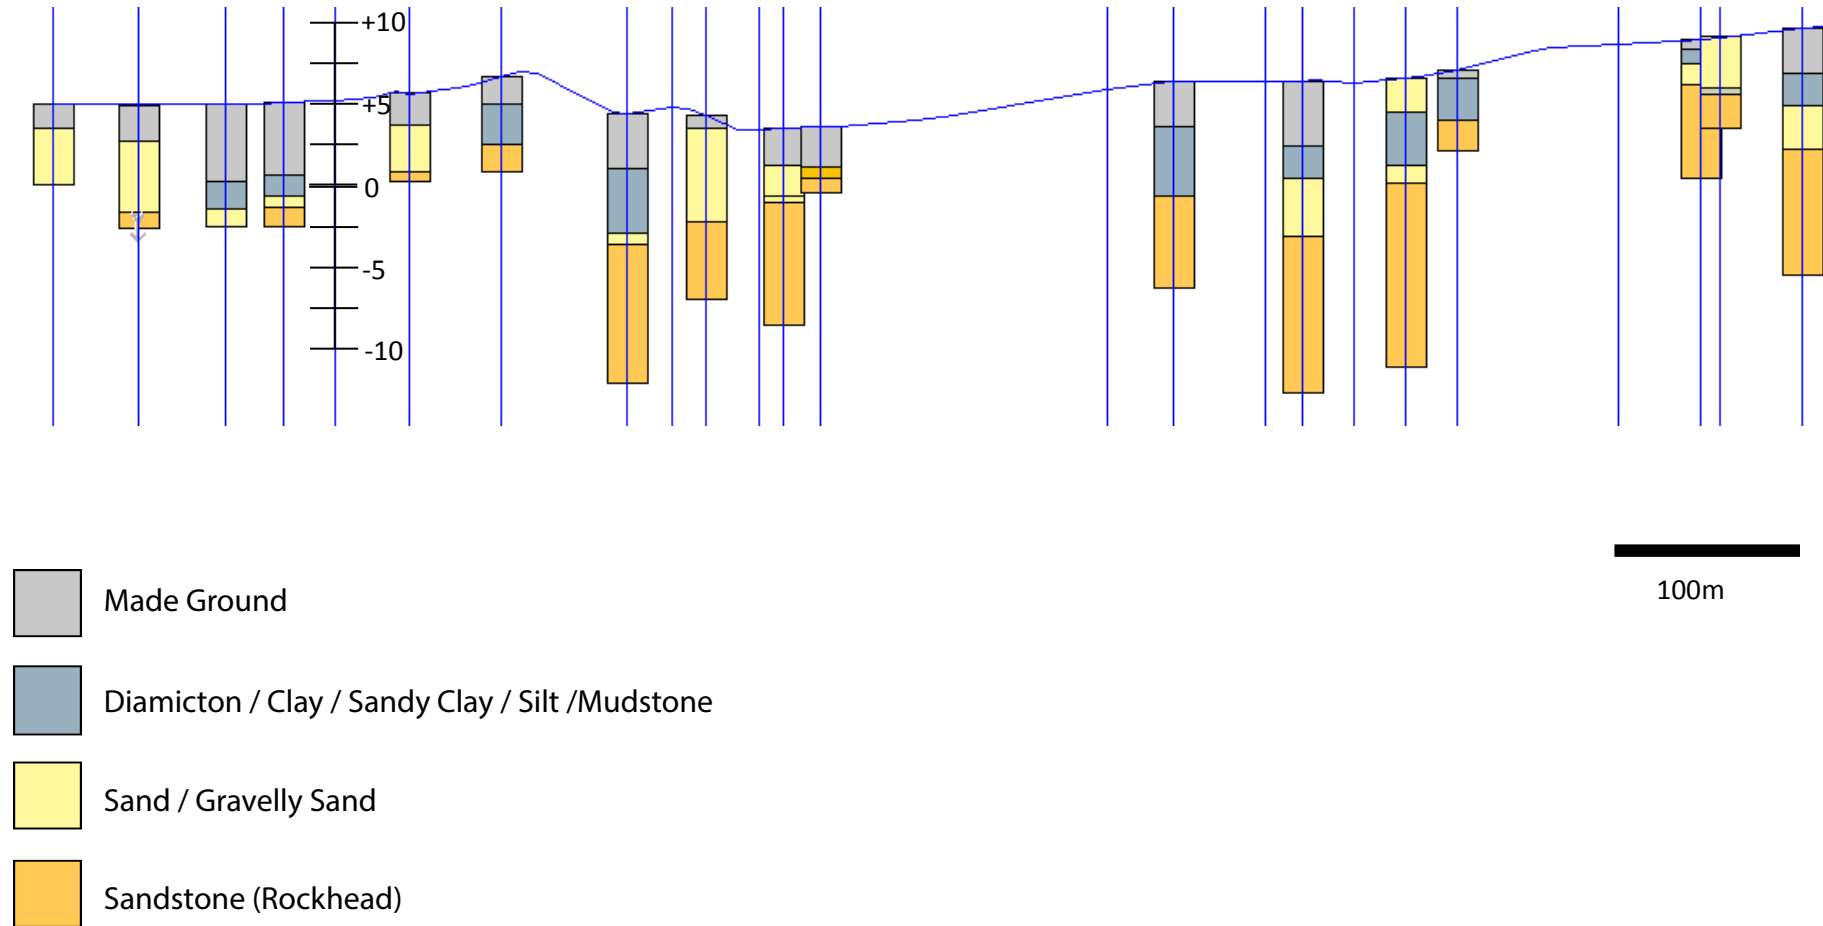

## Situation 11:

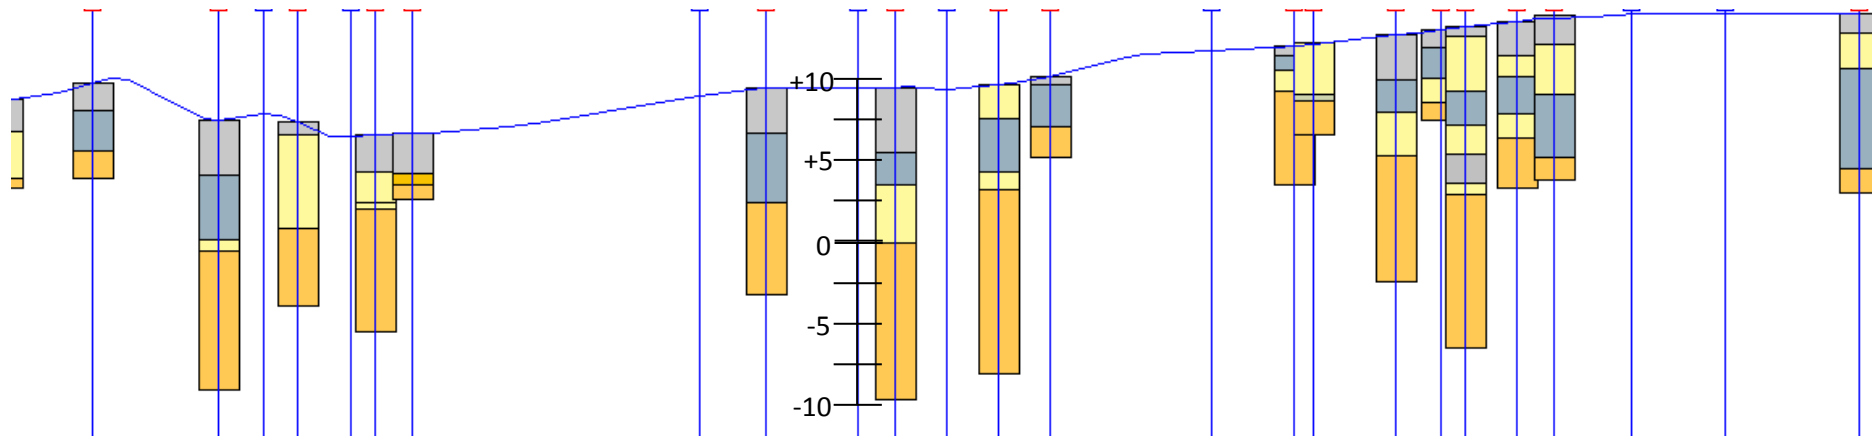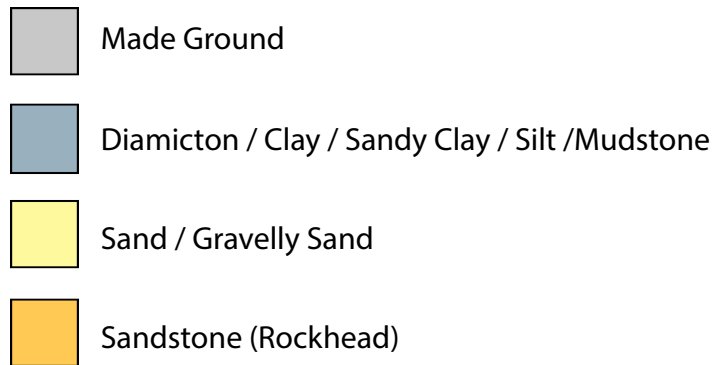

100m
